# Supplementary material for: Influence of multi-decadal land use, irrigation practices and climate on riparian corridors across the Upper Missouri River Headwaters Basin, Montana
Source: Copernicus journal article supplement (doi:10.5194/hess-2019-137), 2019-04-18
Supplement: Supplementary file [file hess-2019-137-AC3-supplement.pdf]

1 **Response to Comments**

2

3 **Manuscript:** Influence of multi-decadal land use, irrigation practices and climate on riparian  
4 corridors across the Upper Missouri River Headwaters Basin, Montana

5

6 **Authors:** Melanie K. Vanderhoof, Jay R. Christensen, Laurie C. Alexander

7

8 **Reviewer #1:**

9

10 **Summary Comment:** I think this is a nice study. The authors used some clever methods to infer  
11 how changes in irrigation practices might be altering riparian zone wetness in semi-arid regions  
12 of the Missouri basin. They do a great job of synthesizing a large number of disparate datasets.  
13 The analyses are thoughtful, the results are interesting, and the discussion is comprehensive. The  
14 authors are careful to note caveats and do not make statements that outstrip the evidence. The  
15 manuscript would have been much stronger if the authors had shown how center-pivot irrigation  
16 trends changed over time, rather than just using the two endpoints in the analysis. Then the  
17 authors could have used a joint model that included climate and land use, rather than this two  
18 step, regression-on-residuals approach. I have some philosophical issues with doing regressions  
19 on residuals, especially when the explained variation from the climate model varies widely  
20 between basins. Doing this would require rewriting the whole paper, though, and I don't think  
21 this is a fatal flaw by any means. I have some questions and minor quibbles that I hope the  
22 authors can address in revisions. I recommend minor revisions and look forward to seeing the  
23 responses of the authors. -Richard Marinos

24 **Response:** We appreciate the supportive comments provided by Richard Marinos. We agree that  
25 the analysis would be stronger if we had spatially explicit, annual data on irrigation methods and  
26 abundance. Because the analysis involved a large number of datasets, generating an additional 30  
27 years of agriculture data was beyond scope. However, we hope that the findings presented in the  
28 analysis provide motivation either for our research group or for others to generate more  
29 agricultural datasets that include data on irrigation type. We have addressed all questions and  
30 quibbles below.

31

32 **Line Comments:**

33 **Lines 81, 92, 111:** Minor stylistic point; you lead each paragraph with qualifiers (e.g. "Although.  
34 . .") which can obscure the main thrust of the paragraph.

35 **Response:** We have removed the term "although" from the start of paragraphs as recommended.

36

37 **Line 135:** "Our research questions included". . . could you list all the research questions that this  
38 paper includes? Else, just say that these were your two questions.

39 **Response:** We have revised this phrase to clarify that those were our 2 research questions.

40

41 **Figure 2:** Did you derive these P and VPD data yourself using the PRISM model, or are these  
42 available data products that you used? If the former, please include this in the results of your  
43 paper, not the methods.

44 **Response:** We did not derive these variables ourselves. The P and VPD data were from the  
45 PRISM model dataset as specified at the start of section 2.4.

46

47 **Line 183:** It seems to me that this approach, only looking at the riparian vegetation that persisted  
48 during the study period, introduces an issue of survivorship bias. Can you justify this choice  
49 further in light of this critique?

50 **Response:** I think what this comment is getting at, is that if a reach had experienced a severe  
51 drying trend then riparian vegetation may have transitioned to non-riparian vegetation (e.g.,  
52 grassland) which would then be missed by the analysis. We focused on persistent riparian  
53 vegetation for two reasons. First, evaluating temporal trends while changing the riparian extent  
54 from year to year introduces the possibility of conflating temporal change with spatial change.  
55 Second, agriculture tends to be immediately adjacent to, and particularly further from the outlet,  
56 is often in the riparian area. Focusing on persistent wetland vegetation allowed us to avoid areas  
57 within riparian areas that went in and out of active agricultural activity. To address this comment  
58 we added the following sentence to section 2.2. “This approach enabled us to reduce uncertainty  
59 in the temporal analysis and increase our confidence in the vegetation type but limited our ability  
60 to detect changes in riparian extent induced by climate or changes in human land use.”

61  
62 **Line 185:** Did you use the DEM to inform identification of riparian vs. upland vegetation? Did  
63 you exclude the active channel from your analyses?

64 **Response:** A 30 m DEM was found to be inadequate to separate riparian from agricultural and  
65 upland vegetation, therefore we did not use it in the delineation. Yes, the active channel was  
66 excluded from the area of analyses. We have added a comment to that effect.

67  
68 **Line 190:** Could you briefly expand on how you arrived at these specific reaches, either in  
69 comments or in the manuscript itself? It seems from the map that contiguous riparian areas cross  
70 the boundaries of your reaches. What distinguishes them as units of analysis?

71 **Response:** We first used the confluences of rivers or the entrance of major tributaries to divide  
72 rivers into reaches. As the reaches were still quite long at this point, we then used the distribution  
73 of agriculture, which tended to occur in clusters along the major rivers, so that breaks between  
74 clusters of agriculture were used as further dividing points. Future work should focus on moving  
75 the analysis to a pixel-scale analysis, eliminating the need for deriving distinguishable reaches.

76  
77 **Line 228:** I wonder how correlated cloud cover and higher NDWI values are, and if this would  
78 skew the analysis toward lower NDWI values. Though you did say that most P is as snowpack.  
79 Not really much to be done about this anyway, just musing.

80 **Response:** It is an interesting thought! Yes, in this watershed the snowpack is the major driver of  
81 river discharge, therefore I suspect the influence of cloud cover would play a relatively minor  
82 role.

83  
84 **Lines 281-299:** How well does this imagery analysis mesh with the cropland extent in the  
85 NLCD?

86 **Response:** We did not compare the multiple sources of crop data with the NLCD. The NLCD  
87 provides land cover data only every 5 years and provides no specific data on crop type or  
88 irrigation method.

89  
90 **Figure 3:** This was very helpful in understanding your data resolution with respect to riparian  
91 zone size.

92 **Response:** Thank you.

93

94 **Line 357:** I am trying to work through the statistical implications of letting the input climatic  
95 variables for the random forests vary by reach. I would feel more confident if you could explain  
96 more why you took this approach, rather than using the same variables across reaches.

97 **Response:** All reaches considered the same set of climate variables. Our goal with this decision  
98 was to find the “best fit” between the independent climate variables considered, and the  
99 dependent variable. Past efforts (e.g., Murphy et al., 2010) have found variable selection to  
100 improve random forest models. Ecologically, it makes sense that the best fit climate variables  
101 may change slightly as we move from snow pack mountains down to the Basin outlet. We also  
102 note that many of the climate variables were highly correlated with each other, so a statistical  
103 selection of one variable over another, may have modified the model very little.

104

105 **Line 391:** This CV approach seems strange to me, unless your datum was the lowest point in the  
106 HUC unit. Is this what you did? Otherwise a HUC unit at a mean elevation of 100 feet would  
107 have 10x the CV of the exact same HUC unit if it was transported to a mean elevation of 1000  
108 feet.

109 **Response:** The elevation coefficient of variation was calculated as the elevation standard  
110 deviation divided by the mean elevation, not as the mean elevation. As you can see in Table 7,  
111 we do not see a directional trend in the elevation coefficient of variation as we move up the  
112 watershed.

113

114 **Line 417:** Saying it’s an uncertainty is an understatement! Ok but I see you’ve qualified your  
115 uses of this more in the following lines.

116 **Response:** In addition to the qualifications, we added the word “major” to the phrase “point of  
117 uncertainty.”

118

119 **Table 5:** Why is only March-June snowfall considered? Did I miss something? Methods general  
120 comment:

121 **Response:** We considered both annual and spring snowfall. Both are listed in Table 3. In our  
122 analysis, spring snowfall consistently out-performed annual snowfall and was one of the best  
123 single predictors to represent annual climate and water availability for this Basin.

124

125 **Comment:** You present a LOT of results in your Methods section. I’d prefer to see these moved  
126 to the Results section.

127 **Response:** We moved the supplementary agriculture statistics to the Discussion section and  
128 moved the 3 tables that contained results data to the Results section.

129

130 **Figures 5 and 6:** These are good figures that answered a lot of questions for me. Could you  
131 include as a supplement these plots for all reaches? I’d be interested to know what the “messier”  
132 reaches look like.

133 **Response:** Providing all of the graphs for all plots would add a lot of extra pages! The key  
134 statistics for each reach are currently provided in Table 3. We have provided the graphs for our  
135 “messiest” reach (defined as the lowest random forest  $R^2$  (GR2) Gallatin River below. We hope  
136 that this adequate.

137

138

139

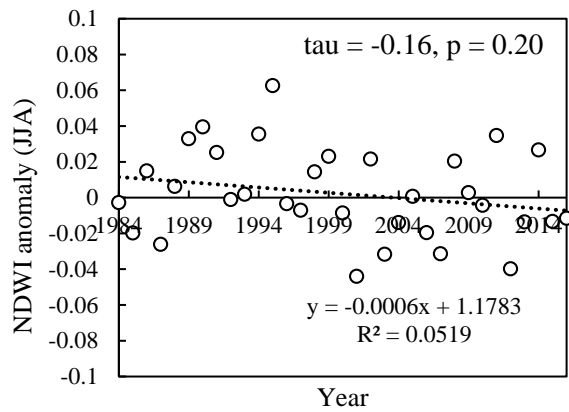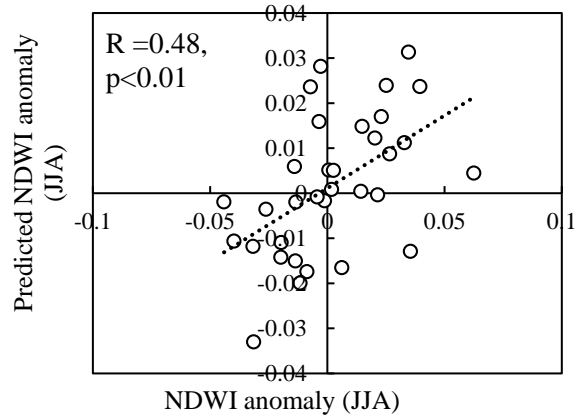

140

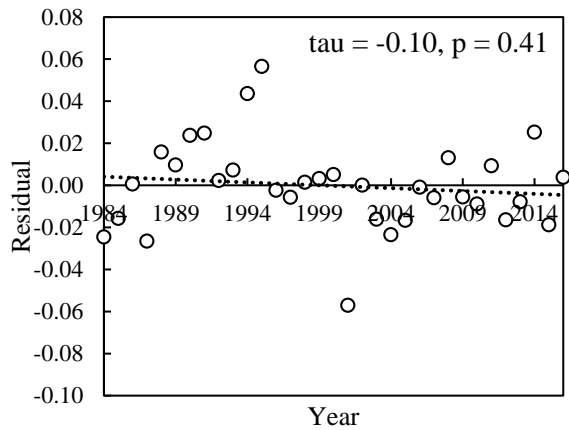

141

142 **Line 518:** I know you give this in Table 6, but could you provide absolute areal changes here  
143 too? It's hard to interpret these percentages without knowing absolute area as well.

144 **Response:** We added the absolute areal change values.

145

146 **Figure 8:** Nice, love these pics.

147 **Response:** Thanks!

148

149 **Line 651:** I am having a hard time understanding this point about cumulative effects. . . unless  
150 your ratio of recharge areas (e.g. mountains with snowpack) to withdrawal areas becomes  
151 smaller with basin size, in which case I could see how this could be the case.

152 **Response:** We substantially shortened this paragraph to limit the discussion of cumulative  
153 effects. We did retain the sentences explaining the need to look at impact of upstream changes  
154 and conditions on the downstream reach of interest.

155

156 **Line 688:** Appreciate this strong caveat.

157 **Response:** Thank you.

158

159

160 **Reviewer #2:**

161

162 **Line 28:** would be helpful to specify what “non-center pivot irrigation” includes earlier in the  
163 paper (perhaps including in the abstract). There is some discussion of this on lines 321-325.

164 **Response:** We revised the abstract and no longer use the term non-center pivot irrigation until  
165 the Methods section. In the methods section we now expand our description to specify “(e.g.,  
166 gravity-fed, non-center pivot sprinklers such as tower sprinklers, solid set and permanent  
167 sprinklers, side roll, big gun or traveler, or hand move sprinklers)”...

168

169 **Comment:** The lack of distinction between gravity fed irrigation and non-center pivot sprinkler  
170 irrigation seems significant. Authors should indicate what is known about the  
171 efficiency/consumptive water use rates of non-center pivot sprinkler vs. center-pivot vs. flood. It  
172 is my understanding that non-center pivot sprinkler would be much more similar to center-pivot  
173 (than to flood) in terms of efficiency/consumptive water use. If non-center pivot sprinkler is not  
174 separated out from flood irrigation, authors need to be very clear and specific about what this  
175 study tells us about flood/gravity fed irrigation.

176 **Response:** In response to this comment we added to the Methods that, “Because this irrigation  
177 infrastructure was not visible in the Landsat imagery, we did not attempt to distinguish gravity-  
178 fed irrigation from non-center pivot sprinkler irrigation. Consequently the datasets as created  
179 enabled us to quantify changes in irrigation extent and shifts toward center-pivot irrigation. It did  
180 not allow us to make estimates of water consumption or quantify shifts from gravity-fed  
181 irrigation to non-center pivot sprinkler irrigation.” We also added a paragraph to the Discussion  
182 to directly respond to this comment:

183 “One source of uncertainty in our analysis is that at the Landsat scale we were unable to  
184 confidently distinguish gravity-fed irrigation from non-center pivot sprinkler irrigation, methods  
185 of irrigation that can be expected to show different rates of water efficiency. This source of  
186 uncertainty made it difficult to reach definitive conclusions about reach-scale changes in the  
187 consumptive water use using our data alone. However, our assumption of a transition away from  
188 gravity-fed irrigation and towards center-pivot irrigation is consistent with other comparable  
189 sources of data. Across Montana the FRIS surveys (1984 and 2013) documented an increase in  
190 the fraction irrigated with center pivot from 9% to 30%, a decrease in the fraction irrigated with  
191 gravity-fed irrigation from 77% to 57%, and a minimal change (<3%) in the fraction of  
192 agriculture irrigated with non-center pivot sprinklers (USDA, 1985, 2014). Across the UMH  
193 Basin, the Montana Department of Revenue’s Final Land Unit Classification (FLU) surveys  
194 documented a 17% increase in center-pivot irrigation and a corresponding decrease in both  
195 sprinkler and gravity-fed irrigation between 2010 and 2017. Despite these ancillary datasets,  
196 however, it is possible that shifts from gravity-fed irrigation to non-center pivot sprinkler  
197 irrigation, have also contributed to changes in return flow and riparian condition.”

198

199 **Line 50:** what is “ditching”? Please re-phrase or clarify

200 **Response:** We revised this to “drainage and water diversion ditches”.

201

202 **Line 129-131:** These citations might be as good or better to make the point that there is  
203 increased interested in river resiliency:

204 Montana Drought Demonstration Partners, 2015: A Workplan for Drought Resilience in the  
205 Missouri Headwaters Basin: A National Demonstration Project.

206 <http://dnrc.mt.gov/divisions/water/management/docs/surface->  
207 [waterstudies/workplan\\_drought\\_resilience\\_missouri\\_headwaters.pdf](http://dnrc.mt.gov/divisions/water/management/docs/surface-waterstudies/workplan_drought_resilience_missouri_headwaters.pdf) (Accessed May 20, 2019).

208  
209 Montana DNRC, 2014: Upper Missouri Basin: Water Plan 2014.  
210 [http://dnrc.mt.gov/divisions/water/management/docs/state-water-plan/uppermissouri/river-basin-](http://dnrc.mt.gov/divisions/water/management/docs/state-water-plan/uppermissouri/river-basin-plan/upper_missouri_basin_report_final.pdf)  
211 [plan/upper\\_missouri\\_basin\\_report\\_final.pdf](http://dnrc.mt.gov/divisions/water/management/docs/state-water-plan/uppermissouri/river-basin-plan/upper_missouri_basin_report_final.pdf) (Accessed May 29, 2019). Montana DNRC, 2015:  
212 Montana

213  
214 State Water Plan: A Watershed Approach to the 2015 Montana State Water Plan. 80. The  
215 citation for McEvoy et al 2018 which is used later in the paper also supports this point –  
216 specifically for UMH - and summarizes the goals of the MT Drought Demonstration Project  
217 Table 2 & Lines 225-228.

218 **Response:** We agree, the citations suggested are a better fit to justify this sentence than the  
219 original citations. We have replaced the citations as recommended.

220  
221 **Comment:** As a social scientist familiar with the issue and study region, my strength is not in the  
222 technical aspects of remote sensing or hydrology, so please take this comment/question with a  
223 grain of salt. I am a bit confused as to why authors report the “average NDWI” and “average  
224 NDVI” in table 2 given that they are more interested in trend over time (not average). The text  
225 on lines 225-228 perhaps explains this – but the paragraph focuses on the per summer “anomaly”  
226 rather “average”. Also this text does not refer back to figure 2. Greater explanation of why  
227 authors report the average in Table 2 would be helpful. In general, the description of the use the  
228 anomaly seems more complicated than it needs to be (?).

229 **Response:** Table 2 was meant to provide an overview of reach-specific characteristics. Inherent  
230 spectral differences between reaches could contribute to our understanding of why we might see  
231 variability in the trends between reaches. We have added this sentence in response to this  
232 comment. “Reach-scale average NDVI and NDWI values were provided to give a sense of the  
233 reach-scale variability in spectral characteristics (Table 2).” In response to the second part of  
234 the comment, NDVI has been much more widely used relative to NDWI for the analysis of  
235 riparian areas. For this reason we felt it was important to justify our decision.

236  
237 **Lines 321-325:** please see my earlier comment re: lack of distinction between non-center pivot  
238 sprinkler and flood irrigation. Authors should include a comment on line 325 about whether/how  
239 this lack of distinction affects the results – and more importantly what it allows the authors to  
240 conclude about flood/gravity fed irrigation practices.

241 **Response:** Please see the responses above and the text added to the Methods and Discussion  
242 sections. We also note that we substantially revised how the ancillary agriculture datasets are  
243 presented so that the statistics can act in direct complement to the data generated within this  
244 study.

245  
246 **Line 328:** the use of the “~” symbol in “NDWI ~ Year” is not clear to me. If the use of “~” is  
247 standard in the field, then ignore my comment, otherwise please specify what that means. This  
248 comment might be related to my previous comment about use of “average NDWI” and “average  
249 NDVI” in Table 2 and the explanatory text re: use of “anomaly” on Lines 225-228.

250 **Response:** We have removed the symbol “~” for increased clarity.

251

252 **Line 374:** the phrase “differences in agriculture” seems to be missing a modifier or unit. Is it  
253 difference in “agricultural area” or in “agricultural practices”? Please specify what this difference  
254 is within agriculture that is referred to.

255 **Response:** We deleted this sentence as we found it a bit out of place here.

256

257 **Line 515:** the phrase “total amount of agriculture was relatively stable” – should specify the ag  
258 unit authors are referring to (I assume this is acres of land in agricultural production? But could  
259 be ag output/yield, which could mean an increase in ag productivity on same amount of land or  
260 stable output, but on fewer acres).

261 **Response:** We revised this to specify hectares of land in agricultural production. We also want to  
262 note that we caught an error in that the percent change in irrigated area had been mistakenly  
263 calculated from the accumulated irrigated area, not the per-reach irrigated area. When we  
264 calculated the change correctly we found a 10.5% increase in irrigated area. We added a  
265 secondary source to the Discussion that found at the state level an increase of 19% in total  
266 hectares of irrigated area over a similar period.

267

268 **Line 554:** same comment as above for phrase “decrease in total agriculture over they study  
269 period” – specify unit of ag (acres? Or production/output/yield?)

270 **Response:** We revised this to “total hectares of irrigated agriculture”. We did not attempt to  
271 calculate product, output or yield, just total area growing crops.

272

273 **Line 667** – same comment “..total amount of agriculture [add units]”

274 **Response:** We revised to avoid the term “total amount” throughout and instead specified  
275 “hectares”.

276

277 **Line 519-520:** Would be helpful if authors can explain how center-pivots get implemented on  
278 the ground. If center pivots increase by 506%, but non-center pivots only decrease by 39% where  
279 are these newly added center pivots going? Are they not replacing non-center pivot? Are they  
280 replacing flood irrigation at a rate of greater than 1:1? Are they being added to newly expanded  
281 agricultural fields (this is not allowed under MT DNRC’s water rights laws, which require  
282 irrigators to specify place of withdrawal – and specifies that there should not be an expansion of  
283 irrigated acreage when irrigators switch to new irrigation system – though this most certainly  
284 happens.)

285 **Response:** In response, we changed the way the irrigation statistics were presented to improve  
286 clarity. So percent change, of course, depends on the value you started with (percent change =  
287 (post – pre) / pre \*100 and because there was very little center pivot irrigation in the mid-1980s  
288 our percent change values were large. We now specify the total number of ha and present the  
289 relative percent of center pivot and non-center pivot. So center-pivot irrigation went from 9% of  
290 irrigated area (8961 ha) to 50% of irrigated area (54,295 ha). We saw primarily conversion from  
291 non-center pivot to pivot irrigation, but we also observed land changing from not actively  
292 cultivated to center-pivot irrigation. Particularly along the Gallatin River.

293

294 **Figure 7:** I believe the headings in c&d should read “Change to reach-scale pivot irrigation” (not  
295 “agriculture”).

296 **Response:** Caption changed as recommended.

297

298 **Figure 7:** use of term “built-up” and “building area” in both figure and the associated text is  
299 confusing. I assume authors are referring to urbanization, but that is not clear.

300 **Response:** The dataset is called “built-up intensity” which is defined as the summed building  
301 area at 250 m resolution. We modified the caption to best match the language used in the figure.

302

303 **Line 618:** why use the word “crop management”? I expected authors to state: “complexities of  
304 ag water use and irrigation practices (or C3 methods)”. In my mind, “crop management” refers to  
305 things like change which type of crop is grown, fallowing, use of cover crops, timing of planting  
306 and harvesting, etc.

307 **Response:** Wording was changed as recommended.

308

309 **Line 636:** phrase “total water-use for irrigation across the US” should be more specific.  
310 Following Perry et al’s 2017 recommendation, authors should specify whether they are referring  
311 to water withdraws or water consumption (the following discussion illustrates this point using  
312 ET, but it seems like the authors could be more careful/specific with their use of the word  
313 “water-use” in line 636.

314 **Response:** This is a good point. We used “total water use” because this was the term used to  
315 label the data in the graph in Schaible (2017). To clarify we used the figure caption which  
316 specified “total water applied for irrigation”

317

318 **Line 670:** “water use” – again, authors should be more specific. Is this “water withdraws”? or  
319 irrigation methods? Or general water use – if so, specify some examples of what this includes

320 **Response:** We removed the term “water use” here.

321

322 **Line 636-650:** Perry et al 2017 make this same point at the global scale. Seems like their paper  
323 should be cited in this part of the discussion.

324 **Response:** We added references to the Perry et al. (2017) paper to this paragraph.

325

326



327 **Influence of multi-decadal land use, irrigation practices and climate on riparian corridors**  
328 **across the Upper Missouri River Headwaters Basin, Montana**

329  
330 Melanie K. Vanderhoof<sup>1</sup>, Jay R. Christensen<sup>2</sup>, Laurie C. Alexander<sup>3</sup>

331  
332 <sup>1</sup>US Geological Survey, Geosciences and Environmental Change Science Center, P.O. Box  
333 25046, DFC, MS980, Denver, CO 80225, USA

334 <sup>2</sup>US Environmental Protection Agency, Office of Research and Development, National Exposure  
335 Research Laboratory, 26 W. Martin Luther King Dr., MS-642, Cincinnati, OH 45268, USA

336 <sup>3</sup>US Environmental Protection Agency, Office of Research and Development, National Center  
337 for Environmental Assessment, 1200 Pennsylvania Ave NW (8623-P), Washington, DC  
338 20460, USA

339  
340 Corresponding Author: Melanie K. Vanderhoof ([mvanderhoof@usgs.gov](mailto:mvanderhoof@usgs.gov), 303.236.1411)

341  
342 **Abstract**

343 The Upper Missouri River Headwaters Basin (36,400 km<sup>2</sup>) depends on its river corridors to  
344 support irrigated agriculture and world-class trout fisheries. We evaluated trends (1984-2016) in  
345 riparian wetness, an indicator of riparian condition, in peak irrigation months (June, July,  
346 August) for 158 km<sup>2</sup> of riparian area across the basin using the Landsat Normalized Difference  
347 Wetness Index (NDWI). We found that 8 of the 19 riparian reaches across the basin showed a  
348 significant drying trend over this period, including all three basin outlet reaches along the  
349 Jefferson, Madison and Gallatin Rivers. The influence of upstream climate was quantified using  
350 per reach random forest regressions. ~~MA~~Although much of the interannual variability in the  
351 NDWI was explained by climate, especially by drought indices and annual precipitation, but the  
352 significant temporal drying trends persisted in the NDWI-climate model residuals, indicating that  
353 trends were not entirely attributable to climate. Over the same period we documented a basin-  
354 wide shift from 9% of agriculture irrigated with center pivot irrigation to 50% irrigated with  
355 center pivot irrigation. a 506% increase in center pivot irrigation and an associated 39%  
356 decrease in non-center pivot irrigation basin-wide. Riparian reaches with a drying trend had a  
357 greater increase in the total area with center pivot irrigation (within-reach and upstream from the  
358 reach) a greater shift towards center pivot irrigation relative to riparian reaches without such a  
359 trend ( $p < 0.054$ ). The drying trend, however, did not extend to river discharge. Over the same  
360 period, stream gages (n=7) showed a positive correlation with riparian wetness ( $p < 0.05$ ), but no  
361 trend in summer river discharge, suggesting that riparian areas may be more sensitive to changes

362 in irrigation return flows, relative to river discharge. Identifying trends in riparian vegetation is a  
363 critical precursor to enhancing the resiliency of river systems and associated riparian corridors.

364

## 365 **Keywords**

366 Center pivot, discharge, headwaters, Landsat, precipitation, wetness

367

## 368 **1. Introduction**

369 Riparian ecosystems provide critical biological, chemical and hydrological functions  
370 (Fritz et al., 2018). Defined as semi-terrestrial areas influenced by freshwaters at the interface of  
371 rivers and adjacent upland areas (Naiman et al., 2005), riparian ecosystems store water, nutrients,  
372 and sediments, reducing downstream flood impacts and non-point source pollution (Lowrance et  
373 al., 1984; Vivoni et al., 2006). They also provide corridors for biotic movement and migration,  
374 particularly through arid, urban and agricultural landscapes (Boutin and Belanger, 2003; Lees  
375 and Peres, 2008), and maintain fish habitat by lowering stream temperatures and contributing in-  
376 stream woody debris (Poole and Berman, 2001; Isaak et al., 2012). Long-term trends in the  
377 degradation of riparian areas are common globally (Stromberg, 2001; Richardson et al., 2007).  
378 The hydrological alteration of rivers, including dam construction, drainage and water diversion  
379 ditches/ditching, flow regulation, and pumping of surface and ground water for human use, can  
380 alter flow timing and magnitude leading to riparian degradation including changes to riparian  
381 functioning, loss of riparian extent, and shift in species composition (Poff et al., 1997; Nilsson  
382 and Berggren, 2000; Sweeney et al., 2004). Periodic drought and continued water withdrawals  
383 degrade cold-water spawning and rearing habitat for salmonid species (Clancy, 1988; Isaak et al.,  
384 2012). Balancing anthropogenic water needs while maintaining or enhancing riparian ecosystem  
385 integrity requires an improved understanding of the relationship between water extraction, river  
386 discharge, and riparian vegetation (Jones et al., 2010; Cunningham et al., 2011).

387 Irrigated agriculture is a primary consumptive use of water in the United States and  
388 globally. Across the United States, 26% of surface water withdrawals and 68% of groundwater  
389 withdrawals are attributable to agricultural irrigation (Dieter et al., 2018). Globally, irrigation  
390 accounts for 70% of water withdrawals (Wisser et al., 2008). Expansion of agricultural irrigation  
391 over the past centuries and shifts in irrigation methods over the past decades have led to major  
392 gains in agricultural productivity, food security, profitability, and crop diversification

393 (Falkenmark and Lannerstad, 2005). As a primary use of water withdrawals and water  
394 consumption, however, irrigated agriculture can be expected to play a key role in local water  
395 cycles. When gravity-fed (i.e., flood) irrigation is applied, water that is not evaporated or  
396 transpired by plants, replenishes soil water storage, recharges aquifers, and contributes return  
397 flows to streams and wetlands (Peterson and Ding, 2005; Perry et al., 2017; Grafton et al., 2018).  
398 Additional groundwater recharge also comes from unlined ditch systems used to convey water to  
399 agricultural fields. Return flow from excess irrigation has been argued to have artificially  
400 elevated autumn and winter streamflow for decades (Kendy and Bredehoeft, 2006). As farmers  
401 switch to more modern irrigation techniques, such as center pivot irrigation, they can achieve  
402 greater crop yields and gross revenue with less water, improving their “crop per drop” ratio (or  
403 water use efficiency; Peterson and Ding, 2005). This shift in irrigation practices, however, is  
404 expected to have hydrological consequences, namely increased evapotranspiration, and a  
405 reduction in surface runoff and subsurface recharge (Ward and Pulido-Velazquez, 2008; Grafton  
406 et al., 2018) which can impact local aquifers (Peterson and Ding, 2005; Pfeiffer and Lin, 2014),  
407 base flow (Kendy and Bredehoeft, 2006; Gosnell et al., 2007), as well as and potentially riparian  
408 ecosystems (Carrillo-Guerrero, 2013).

409 ~~W~~Although water withdrawals for irrigation may impact local water cycling, but patterns  
410 in river discharge and riparian vegetation are largely driven by a watershed’s climate patterns.  
411 Riparian vegetation tends to be adapted to highly variable fluvial disturbance regimes, a product  
412 of seasonal and interannual variability in river discharge, with riparian wetness peaking during  
413 episodic storm and flood events and lessening during drought events (Hughes, 2005; Goudie,  
414 2006; Capon, 2013). River discharge and groundwater hydrology, in turn, tends to be highly  
415 responsive to variability in precipitation and evaporative demand (Goudie, 2006; Dragoni and  
416 Sukhiga, 2008; Hausner et al., 2018). Further, in snow-melt dominated systems, changes in snow  
417 pack storage and rain to snow event ratios can influence the timing of river discharge and  
418 regional groundwater recharge, impacting water availability in associated riparian areas (Rood et  
419 al., 2008).

420 While satellite imagery offers a cost-effective means to monitor landscapes, the narrow,  
421 linear nature of riparian corridors presents a challenge for ecosystem characterization with  
422 remote sensing tools (Klemas, 2014; Vanderhoof and Lane, 2019). Along large rivers, Landsat  
423 satellites provide a multi-decadal source of imagery to monitor changes in riparian vegetation

424 (Jones et al., 2010; Henshaw et al., 2013). Remote sensing can also complement field data to  
425 enhance our understanding of the relationship between riparian vegetation and agents of change,  
426 such as climate (Huntington et al., 2016). The Normalized Difference Vegetation Index (NDVI)  
427 (Tucker, 1979) is the most commonly used spectral index to evaluate changes in riparian  
428 vegetation over time (Fu and Burgher, 2015; Hamdan and Myint, 2015; Nguyen et al., 2015;  
429 Hausner et al., 2018). Trends in riparian greenness have been related successfully to climate  
430 variables and river discharge (Shafroth et al., 2002; Fu and Burgher, 2015; Nguyen et al., 2015),  
431 in part because riparian and wetland herbaceous species can respond rapidly to changes in soil  
432 moisture. Thus, riparian greenness tends to reflect river corridor hydrologic processes  
433 (Stromberg et al., 2001, 2006; Jones et al., 2008). Other indices can also potentially inform  
434 riparian wetness. For instance, the normalized difference wetness index (NDWI) was designed to  
435 be sensitive to changes in leaf and soil water content as well as to identify waters associated with  
436 wetlands or floodplains (Gao, 1996; McFeeters, 1996). This index has been used successfully,  
437 for example, to monitor changes in the extent of waterlogged areas (e.g., Chatterjee et al.,  
438 2005; Chowdary et al., 2008).

439         Despite the potential for satellite imagery to characterize plant-water interactions along  
440 riparian corridors, few studies have evaluated the impact of changing irrigation methods on  
441 riparian vegetation (Klemas, 2014; Perry [et al.](#), 2017), or have attempted to distinguish the  
442 relative influence of climate and agricultural irrigation on riparian vegetation. The Upper  
443 Missouri River Headwaters (UMH) Basin in southwestern Montana provides an excellent case  
444 study for exploring the interactions between climate, irrigation and riparian vegetation. The basin  
445 contains the Jefferson, Madison, and Gallatin Rivers, all of which support world-class cold-water  
446 trout fisheries that provide substantial economic value to the region (Duffield et al., 1992;  
447 Kerkvliet et al., 2002; Gosnell et al., 2007). In addition, the agricultural valleys of the basin are  
448 very productive yet rely on a complex irrigation system to water crops grown in and near riparian  
449 areas. Irrigation accounts for 97% of Montana's consumptive water use (Clifford, 1995; Dieter et  
450 al., 2018). Along with the high demand for irrigation water (Goklany, 2002; Schaible and  
451 Aillery, 2012), there are also increasing public water supply needs in the basin (Hansen et al.,  
452 2002; Gude et al., 2006). Finally, the timing of peak river flows is predicted to change,  
453 attributable to warmer temperatures at higher elevations and more precipitation in winter and  
454 early spring occurring as rainfall rather than snow (Pederson et al., 2011, 2013; USBR, 2012).

455 All of these factors are contributing to an increasingly uncertain supply of water across the basin,  
456 particularly in the late summer. This uncertainty, in turn, has elevated interest in improving the  
457 resiliency of local streams and rivers so that the basin can continue to support the agricultural,  
458 recreational, municipal and ecological needs of the watershed ([Montana DNRC, 2014, 2015;](#)  
459 [Montana Drought Demonstration Partners, 2015; McEvoy et al., 2018](#))~~Ziemer et al., 2006; Jones~~  
460 ~~et al., 2012; Gärtner et al., 2013~~). In this study we used a time series of Landsat imagery (1984-  
461 2016) together with climate datasets, agricultural datasets, and U.S. Geological Survey (USGS)  
462 stream gage datasets to explore trends over time in riparian vegetation for the major river valleys  
463 across the UMH Basin. We sought to link the temporal trends not explained by climate to  
464 changes in land use type and intensity. Our research questions ~~were included:~~

- 465 1. How does remotely sensed riparian wetness across the UMH Basin reflect interannual  
466 variability in climate and river discharge?
- 467 2. How and to what degree are trends in riparian wetness from 1984-2016 attributable to  
468 changes in climate versus shifts in land use such as irrigation practice?

469

## 470 **2. Methods**

### 471 **2.1 Study Area**

472 The study area was the UMH Basin (36,400 km<sup>2</sup>). Near the basin outlet, the Jefferson,  
473 Madison ,and Gallatin Rivers merge to form the Missouri River at Three Forks, Montana. A total  
474 of nine rivers were included in the analysis with riparian vegetation divided into 19 riparian  
475 reaches (Fig. 1). Hydrologic regimes of the rivers across the basin are snow-melt dominated  
476 (Markstrom et al., 2016; Cross et al., 2017) with multiple mountain ranges contributing surface  
477 runoff and ground water recharge to valley aquifers (Hackett et al. 1960; Slagle 1995). Annual  
478 precipitation across the basin averages 565 mm yr<sup>-1</sup>, most of which falls in the mountains, where  
479 it is received primarily as snow (Fig. 2). The annual maximum and minimum temperatures  
480 average 10 °C and -3 °C respectively (1981-2010 period of record) (PRISM Climate Group,  
481 2018). Elevations across the basin range from 1231 m to 3433 m (Gesch, 2002). While the  
482 mountain ranges are dominated by evergreen forest (35%), at lower elevations, the forest gives  
483 way to herbaceous vegetation (35%) and shrub/scrub (20%) cover types that dominate the large  
484 river valleys (Homer et al., 2015, Fig. 2). Agriculture occurs primarily in the lower elevations  
485 adjacent to many of the major rivers. As of 2017, alfalfa was the most common crop (41%),

486 followed by other non-alfalfa hay crops (25%), barley (11%) and spring wheat (11%) (USDA,  
487 2018). The riparian ecosystems along the major rivers are dominated by tree species including  
488 cottonwood (*Populus* spp.), willow (*Salix* spp.), and alder (*Alnus* spp.); shrubs including  
489 chokecherry (*Prunus virginiana*), snowberry (*Symphoricarpos* spp.), and wild rose (*Rosa*  
490 *woodsia*); and wet meadows dominated by cattails (*Typha* spp.), sedges (*Carex* spp.), and rushes  
491 (*Juncus* spp.). Warming temperatures in March and April initiate snowmelt and a corresponding  
492 increase in river discharge. Spring precipitation and snowmelt produce peak river discharge in  
493 May and June (Cross et al., 2017) followed by a sharp decline in July and August due to a  
494 dwindling supply of melt water from snow pack and consumptive use from withdrawals. Late  
495 autumn through early spring are generally characterized by lower flow conditions, presumably  
496 dominated by baseflow contributions from groundwater discharge (Cross et al., 2017). Major  
497 waterbodies across the basin are predominately reservoirs located upstream from dams (Fig. 1b)  
498 that support irrigation, hydropower, and recreation.



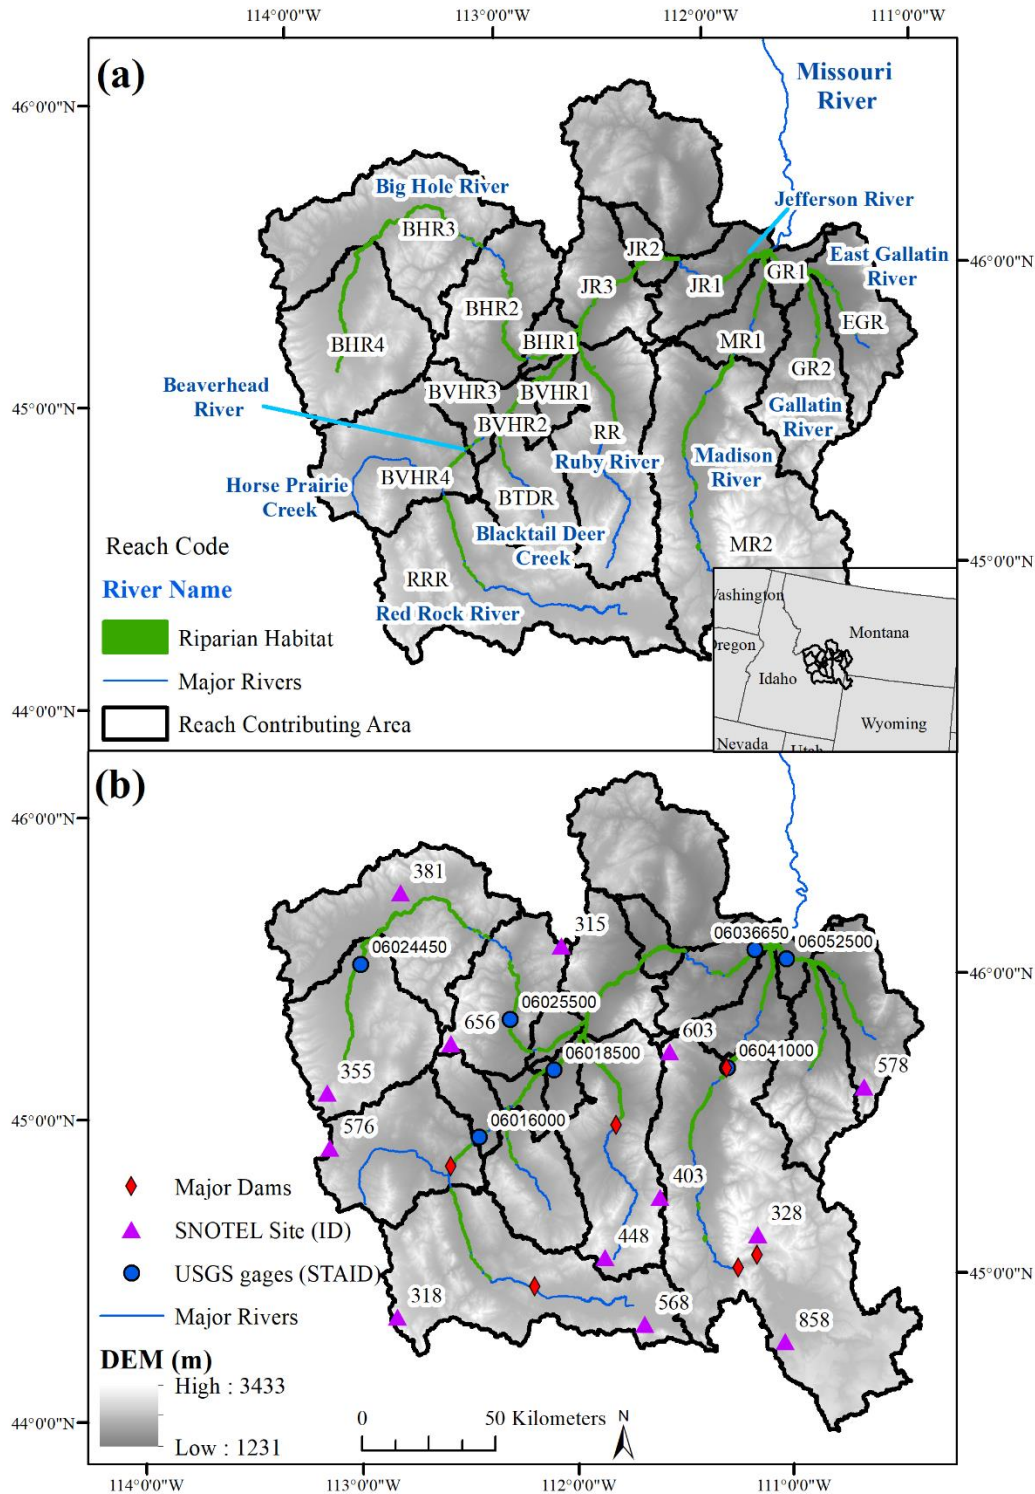

499 **Figure 1.** (a) The major rivers considered in the analysis, the distribution of the riparian areas  
500 evaluated, and the division of the riparian areas into reaches across the Upper Missouri River  
501 Headwaters Basin, southwestern Montana, USA. (b) The spatial distribution of the U.S.  
502 Geological Survey stream gages and snow telemetry (SNOTEL) sites considered in the analysis.  
503 STAID: Station ID, DEM: Digital Elevation Model.  
504

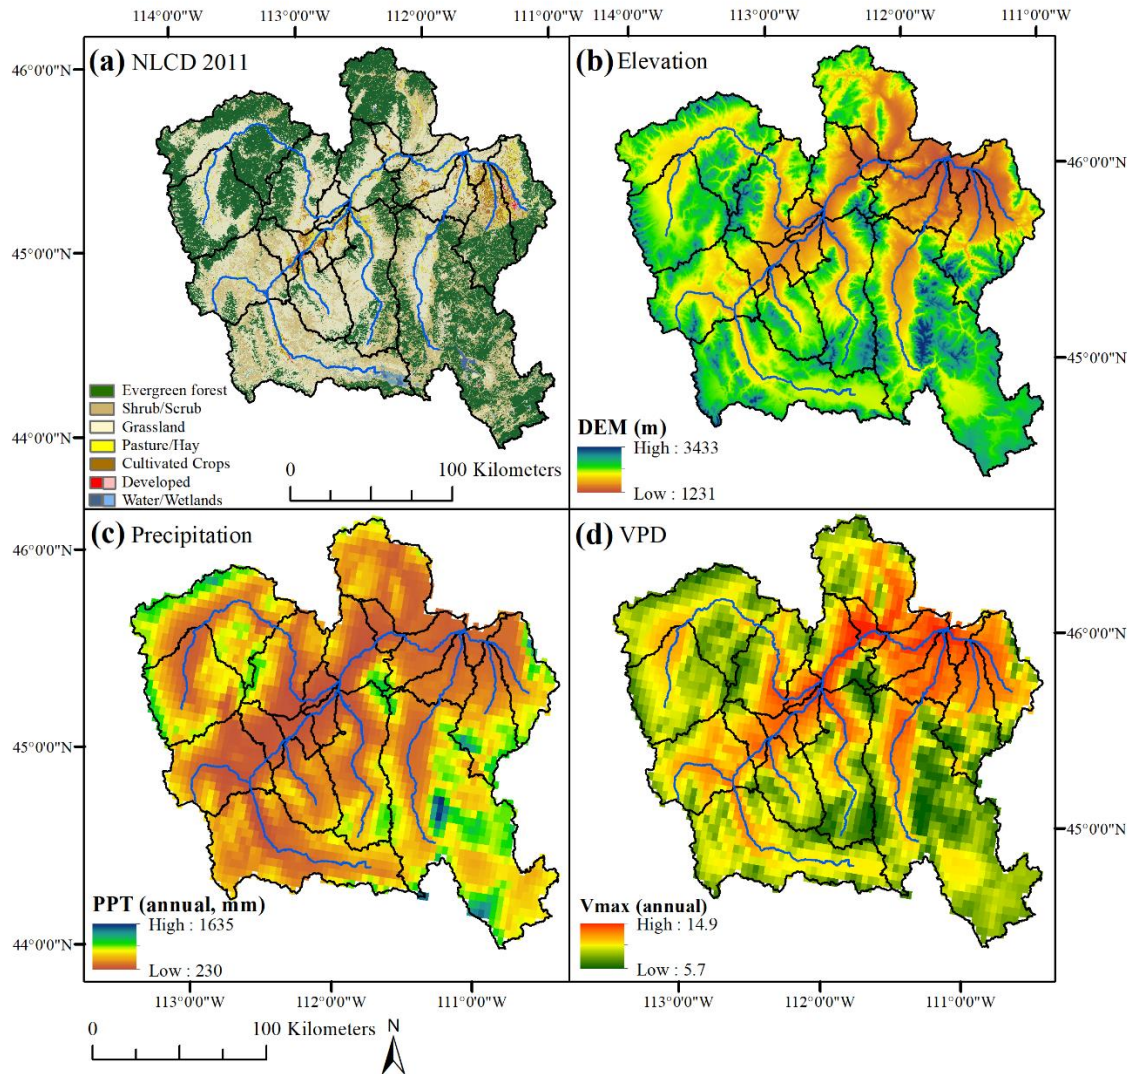

505  
 506 **Figure 2.** Spatial variability in (a) landcover, defined using the 2011 National Land Cover  
 507 Database (NLCD), (b) elevation, (c) mean annual precipitation (PPT), and (d) mean annual vapor  
 508 pressure deficit (VPD), across the Upper Missouri River Headwaters Basin. DEM: Digital  
 509 Elevation Model, Vmax: maximum vapor pressure deficit.

510  
 511 **2.2 Unit of Analysis**

512 The objective of this study was not to document changes in the total amount of riparian  
 513 vegetation, but instead to document temporal variability and trends in the wetness of persistent  
 514 riparian vegetation in relation to climate and landscape variables. The extent of persistent  
 515 riparian vegetation in major river valleys was delineated manually using Landsat imagery from  
 516 1985, 1986, 2016, and 2017 (Table 1). National Agricultural Imaging Program (NAIP) imagery  
 517 was also used to improve accuracy in areas where agriculture was inter-mixed with riparian  
 518 vegetation. The active river channel was excluded from the area of analyses. For headwater



519 reaches, riparian areas upstream of all identifiable irrigated agriculture were excluded from the  
 520 analysis. This approach enabled us to reduce uncertainty in the vegetation types and the temporal  
 521 analysis but potentially limited our ability to include changes where there was a complete loss or  
 522 novel gain of riparian vegetation.

523 For trend analysis, we used river topology, topography, and clusters of irrigated  
 524 agriculture to divide the delineated riparian areas into 19 study reaches (Table 2, Fig. 2). After  
 525 riparian reach lengths were defined, the per reach contributing area was calculated using the  
 526 Spatial Tools for the Analysis of River Systems (STARS, v 2.0.4) (Peterson, 2017). All pits and  
 527 flow interruptions in the digital elevation model (DEM) were filled. The flow direction for the  
 528 river network was generated and the rivers burned into the DEM. The area contributing to the  
 529 downstream point of each riparian reach (n=19) was estimated so that each contributing area was  
 530 non-overlapping with edge-matching inter-basins (Theobald et al., 2006) (Table 2, Fig. 1).

531  
 532 **Table 1.** Landsat images used to map agricultural extent. The Palmer Hydrological Drought  
 533 Index (PHDI) values were provided for the month of July. The percent was calculated based on  
 534 the values that occurred between 1984 and 2017. TM: Thematic Mapper, OLI: Operational Land  
 535 Imager

| Date      | Path/Row | Sensor | PHDI (%)     |
|-----------|----------|--------|--------------|
| 6-Aug-85  | p39r28   | TM     | -2.85 (12.6) |
| 6-Aug-85  | p39r29   | TM     | -2.85 (12.6) |
| 31-Jul-86 | p40r28   | TM     | 0.33 (43.0)  |
| 31-Jul-86 | p40r29   | TM     | 0.33 (43.0)  |
| 2-Aug-16  | p40r28   | OLI    | -2.22 (19.3) |
| 2-Aug-16  | p40r29   | OLI    | -2.22 (19.3) |
| 29-Jul-17 | p39r28   | OLI    | -1.03 (35.2) |
| 29-Jul-17 | p39r29   | OLI    | -1.03 (35.2) |

536

537 **Table 2.** Characteristics of each riparian reach considered including river length, riparian area analyzed, riparian reach contributing  
 538 area, and average (1984-2016) growing-season (June, July, August, JJA) Normalized Difference Wetness Index (NDWI) and  
 539 Normalized Difference Vegetation Index (NDVI). Standard error shown in parentheses.

| Reach Code | River                 | River Length (km) | Riparian Area (ha) | Reach Contributing Area (km <sup>2</sup> ) | Total Upstream Contributing Area (km <sup>2</sup> ) | NDWI (JJA)  | NDVI (JJA)  |
|------------|-----------------------|-------------------|--------------------|--------------------------------------------|-----------------------------------------------------|-------------|-------------|
| JR1        | Jefferson River       | 55.4              | 1190               | 1021                                       | 24711                                               | 0.17 (0.01) | 0.38 (0.01) |
| JR2        | Jefferson River       | 25                | 745                | 395                                        | 21233                                               | 0.22 (0.01) | 0.41 (0.01) |
| JR3        | Jefferson River       | 48.9              | 1080               | 1348                                       | 20839                                               | 0.22 (0.01) | 0.41 (0.01) |
| BVHR1      | Beaverhead River      | 47.9              | 805                | 377                                        | 8867                                                | 0.20 (0.01) | 0.47 (0.01) |
| BVHR2      | Beaverhead River      | 34.3              | 352                | 345                                        | 8491                                                | 0.26 (0.01) | 0.51 (0.01) |
| BVHR3      | Beaverhead River      | 24                | 218                | 544                                        | 6774                                                | 0.21 (0.01) | 0.48 (0.01) |
| BVHR4      | Beaverhead River      | 93.8              | 160                | 2236                                       | 6230                                                | 0.26 (0.01) | 0.50 (0.01) |
| RRR        | Red Rock River        | 158               | 410                | 3993                                       | 3993                                                | 0.27 (0.01) | 0.50 (0.01) |
| BTDR       | Black Tail Deer River | 77                | 26                 | 1373                                       | 1373                                                | 0.22 (0.01) | 0.45 (0.01) |
| RR         | Ruby River            | 180.2             | 813                | 2726                                       | 2726                                                | 0.27 (0.01) | 0.49 (0.01) |
| BHR1       | Big Hole River        | 29.9              | 800                | 317                                        | 7898                                                | 0.20 (0.01) | 0.43 (0.01) |
| BHR2       | Big Hole River        | 64                | 850                | 1838                                       | 7581                                                | 0.23 (0.01) | 0.42 (0.01) |
| BHR3       | Big Hole River        | 104.6             | 1623               | 3259                                       | 5743                                                | 0.12 (0.01) | 0.37 (0.01) |
| BHR4       | Big Hole River        | 75.3              | 1717               | 2484                                       | 2484                                                | 0.17 (0.01) | 0.49 (0.01) |
| MR1        | Madison River         | 53.7              | 1072               | 886                                        | 8231                                                | 0.22 (0.01) | 0.40 (0.01) |
| MR2        | Madison River         | 108               | 1771               | 7345                                       | 7345                                                | 0.22 (0.01) | 0.38 (0.01) |
| GR1        | Gallatin River        | 20.9              | 495                | 310                                        | 3427                                                | 0.23 (0.01) | 0.45 (0.01) |
| GR2        | Gallatin River        | 54.4              | 1058               | 1660                                       | 1660                                                | 0.29 (0.01) | 0.53 (0.01) |
| EGR        | East Gallatin River   | 73                | 602                | 1457                                       | 1457                                                | 0.24 (0.01) | 0.52 (0.01) |

540

### 541 **2.3 Dependent Variable**

542 The NDWI calculated from Landsat imagery ( $(NIR - SWIR1)/(NIR + SWIR1)$ ) (Gao,  
543 1996; McFeeters, 1996) was used to estimate riparian wetness. Relative to other indices such as  
544 the NDVI, NDWI is considered to be less sensitive to atmospheric conditions including solar  
545 elevation angle, sensor angle, and atmospheric condition, making it suitable for time series  
546 analysis (Crétau et al., 2015), and has been used to monitor patterns in waterlogged areas  
547 (e.g., Chatterjee et al., 2005; Chowdary et al., 2008). Reach-scale average NDVI and NDWI  
548 values were provided to give a sense of the reach-scale variability in spectral characteristics  
549 (Table 2). NDWI values greater than approximately 0.3 are typically used to distinguish open  
550 water (Chatterjee et al., 2005; Chowdary et al., 2008; McFeeters, 2013). Across the UMH Basin,  
551 we determined that riparian NDWI values were more sensitive to interannual variability in  
552 climate (Fig. 3) and river discharge than NDVI, making it a more appropriate index for this  
553 analysis. Per year, average NDWI values (June – August, 1984-2017, 102 values per riparian  
554 reach) were calculated using the Landsat surface reflectance image collections in Google Earth  
555 Engine for all delineated riparian reaches (n=19). June, July and August were selected to  
556 correspond to peak months for irrigation water withdrawals (Bauder, 2018). Potentially  
557 erroneous values were defined as values that were greater or less than plus or minus two standard  
558 deviations from the riparian reach-specific mean monthly and were removed. To normalize the  
559 data for ~~seasonal variation~~seasonality, values were calculated as the anomaly from the riparian  
560 reach specific, long-term (1984-2017) mean monthly value (NDWI anomaly), then averaged  
561 summer values (June-August) to provide a single NDWI anomaly per summer, per reach. The  
562 multi-month approach compensated for data gaps created when cloud cover masked Landsat  
563 NDWI values.

564

### 565 **2.4 Independent Variables**

566 Climate variables derived from the Parameter-elevation Regressions on Independent  
567 Slopes Model (PRISM, 4 km resolution, Daly et al., 2008) included annual precipitation, annual  
568 lagged (one year) precipitation, winter precipitation (January-March), spring precipitation  
569 (March-May), summer precipitation (June-August), spring maximum and minimum temperature  
570 (March-May), summer maximum and minimum temperature (June-August) and maximum vapor  
571 pressure deficit (VPD; spring and summer). VPD represents a measure of the drying power of

572 the air and is a function of air temperature and humidity. Across the contributing area of each  
573 riparian reach (n=19), 100 points were randomly selected (total points = 1900). To generate  
574 basin-wide values, the climate values for each year (1984-2016) were extracted for each point,  
575 averaged for the reach, then weighted using the relative size (ha) of each reach across the basin.  
576 Because upstream climate, such as snowfall or precipitation, can influence downstream riparian  
577 wetness, climate variables for each riparian reach were similarly calculated using the area-  
578 weighted average values for that reach and all reaches contributing to that reach.

579 To characterize interannual variability in snowfall, we used a total of 13 Snow Telemetry  
580 (SNOTEL) sites (IDs: 315, 318, 328, 355, 381, 403, 448, 568, 576, 578, 603, 656, 858). Annual  
581 total snowfall (September – August) and total spring snowfall (March-July) were calculated for  
582 each SNOTEL site. For each riparian reach we identified the nearest one or two SNOTEL sites,  
583 using the SNOTEL site immediately upstream from the riparian reach as available. When two  
584 SNOTEL sites were used, the snowfall amounts were averaged across the two sites. Only sites  
585 with data available for the entire period of 1984-2017 were used (NSIDC, 2018). To further  
586 characterize climate conditions, we included the monthly Palmer Drought Severity Index (PDSI)  
587 and the Palmer Z-Index for NOAA NCDC Division 2 in Montana. Both indices are calculated  
588 from precipitation and temperature station data and interpolated at 5 km (NOAA NCDC 2014).  
589 The PDSI represents the accumulation or deficit of water over the past approximately 9 months,  
590 while the Palmer Z-Index represents the current monthly conditions with no memory of previous  
591 deficits or surpluses (NOAA NCDC 2014). The indices were averaged to spring (March-May),  
592 summer (June-August), and annual, and represent multi-month averages of the drought indices.  
593 Temporal trends (1984-2016) in the climate variables were tested at the basin scale using the  
594 non-parametric Mann-Kendall test for trends (Kendall R package) (Mann, 1945, Kendall, 1975,  
595 Gilbert, 1987). Each SNOTEL site was tested independently for temporal trends in snowfall.

596

## 597 **2.5 Agricultural Patterns**

598 We sought to relate patterns in riparian wetness to patterns in total irrigated agricultural  
599 area and the relative abundance of irrigation methods. ~~The USGS Water Use Surveys track~~  
600 ~~surface and groundwater withdrawals and uses every five years (1950-2015) at a county scale~~  
601 ~~(USGS 1988; Dieter et al., 2018). In both 1985 and 2015, 99% of water withdrawals were~~  
602 ~~surface water, and 99% of the total water withdrawals (surface + groundwater) were for~~

603 irrigation across Beaverhead, Gallatin, Jefferson and Madison counties (USGS 1988; Dieter et  
604 al., 2018). Across these counties total water withdrawals were 3% less in 2015 relative to 1985,  
605 although this pattern was variable across the basin with the Gallatin and Madison counties  
606 showing a 27% and 9% increase in water withdrawals, respectively, and the Jefferson and  
607 Beaverhead counties showing a 48% and 15% decrease in water withdrawals, respectively  
608 (USGS, 1988; Dieter et al., 2018). Across the UMH Basin, the Montana Department of  
609 Revenue's Final Land Unit Classification (FLU, 2010 and 2017) provides spatially explicit data  
610 on the irrigation methods used per field, while the U.S. Department of Agriculture's (USDA)  
611 CropScape (2007-2017) provides annual data on the spatial extent and crop type of agriculture.  
612 Between 2010 and 2017, the Montana State's FLU dataset documented a 1.6% increase in total  
613 irrigated agriculture, but a 17% increase in the area irrigated by center pivot irrigation.

614 These Existing sources of data, such as the Montana Department of Revenue's Final  
615 Land Unit Classification (FLU, 2010 and 2017) or the USGS (county-scale) Water Use Surveys  
616 (1950-2015), however, lacked a spatially explicit dataset of agricultural extent and irrigation  
617 methods for the early part of the Landsat archive (1980s). Therefore, we generated two  
618 agricultural extent datasets representing the two temporal ends of the Landsat archive  
619 (1985/1986 and 2016/2017). The Landsat images used to define the active cropland extent are  
620 shown in Table 1. Cloud cover was only present in the mountainous areas in all images used. We  
621 recognize that by using a single Landsat image (instead of multiple images collected over the  
622 growing-season) and only representing the ends of the study time span, we may be  
623 underestimating agricultural extent and missing year-to-year variability in agricultural activities.  
624 Generating agriculture extent and irrigation types for the beginning and end of our study period,  
625 however, enabled us to identify spatially explicit trends or shifts in agricultural practices that  
626 have been previously shown at a county/state scale (USDA, 2018). Cropland extent was  
627 generated initially using eCognition 9.2 software (Trimble, Westminster, CO). The Landsat  
628 images were segmented into objects using the near infrared (NIR), red, and green bands. The  
629 FLU 2017 data layer was used to mask out non-crop and non-pasture land cover types. The  
630 objects were classified as agriculture or non-agriculture using NDVI thresholds. The draft  
631 agricultural outputs were then manually edited to add and remove agricultural fields as needed.  
632 Fallow fields were not included in the agricultural extent as they were assumed to be non-  
633 irrigated for that year. For overlapping portions between adjacent Landsat images, a field was

634 included as crop if it was identified as such in either image. It is possible there could be potential  
635 confusion between non-center pivot irrigation and non-irrigated fields, however, 92 and 93% of  
636 the 1985/1986 and 2016/2017 agricultural area, respectively, co-occurred with Montana FLU  
637 polygons classified as irrigated, suggesting that non-irrigated agriculture is a minority cover class  
638 across the UMH basin.



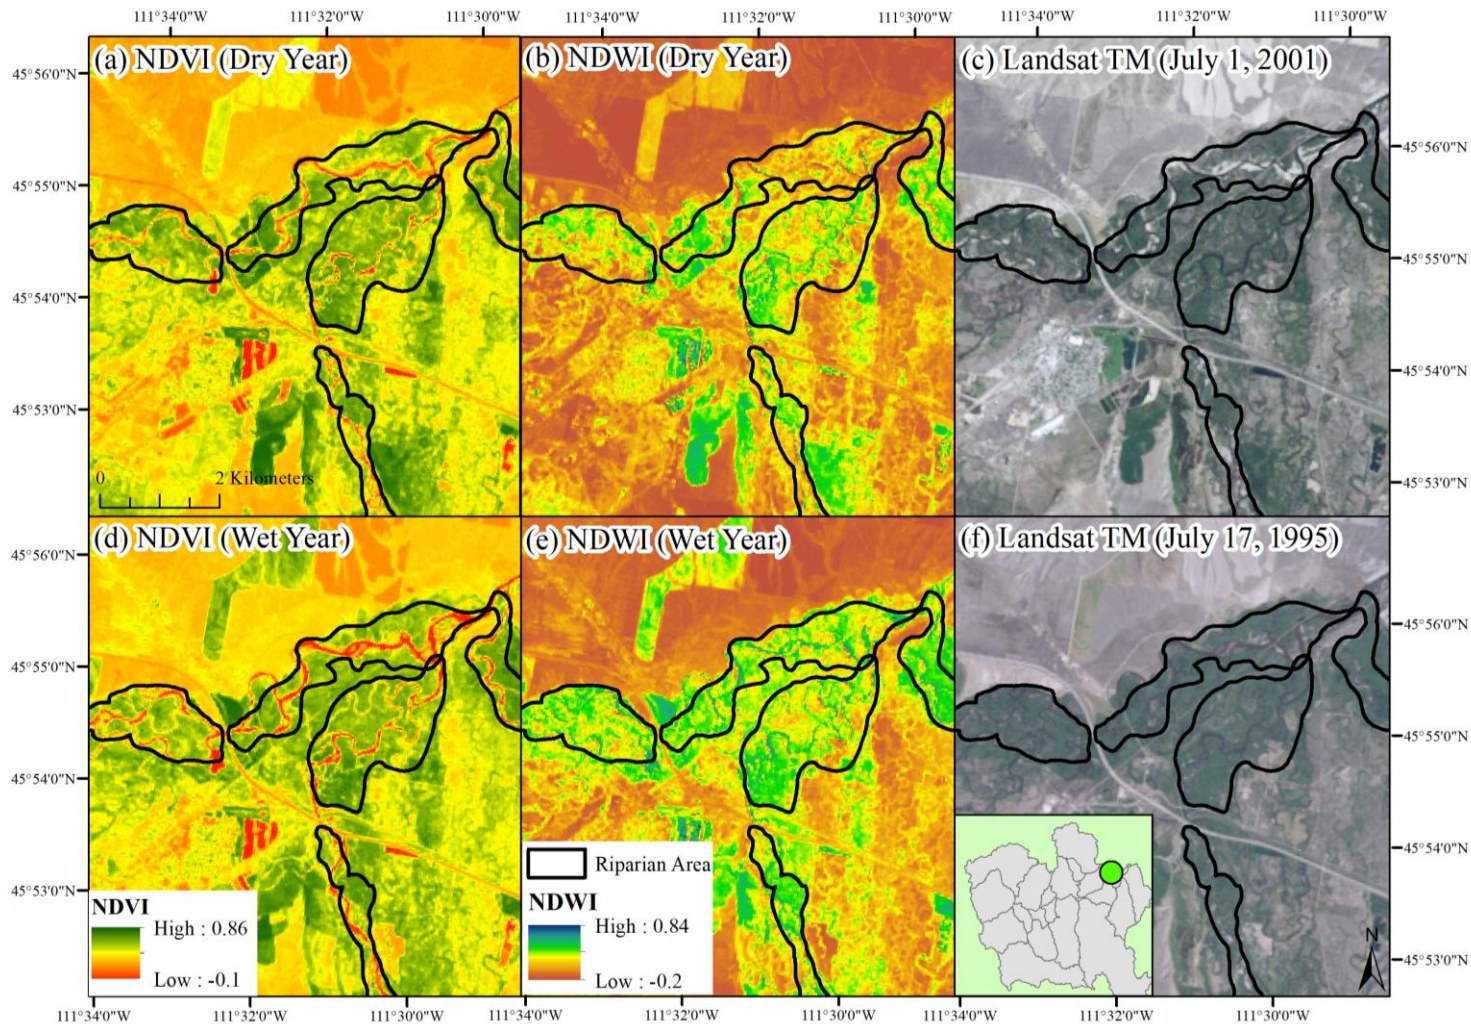

639  
 640 **Figure 3.** A visual comparison of index values in a dry year (2001, 431 mm annual precipitation) and a wet year (1995, 687 mm  
 641 annual precipitation) at the confluence of Jefferson, Madison and Gallatin Rivers. The Normalized Difference Wetness Index (NDWI)  
 642 in the riparian vegetation showed more variability in response to precipitation relative to the Normalized Difference Vegetation Index  
 643 (NDVI). A comparison of (a) NDVI (July 2001), (b) NDWI (July 2001), (c) raw Landsat image (July 1, 2001), (d) NDVI (July 1995),  
 644 (e) NDWI (July 1995), and (f) raw Landsat image (July 17, 1995). A similar pattern was observed across the basin.

645 Active crop fields were further classified manually as center pivot irrigation or non-center  
646 pivot irrigation (e.g., gravity-fed, non-center pivot sprinklers such as tower sprinklers, solid set  
647 and permanent sprinklers, side roll, big gun or traveler, or hand move sprinklers) based on field  
648 shape (i.e., round, not round). ~~There may be potential confusion between non-center pivot~~  
649 ~~irrigation and non-irrigated fields, however, 92 and 93% of the 1985/1986 and 2016/2017~~  
650 ~~agricultural area, respectively, co-occurred with FLU polygons classified as irrigated, suggesting~~  
651 ~~that non-irrigated agriculture is a minority cover class across the UMH basin.~~ For reference, the  
652 FLU polygons were classified as center\_pivot, sprinkler or gravity-fed using irrigation  
653 infrastructure (gates, ditches, dikes) identifiable from National Agricultural Imaging Program  
654 (NAIP) images (1 m resolution). Sprinkler irrigation was distinguished using parallel wheel  
655 lines. Because this irrigation infrastructure was not visible in the Landsat imagery, Our efforts, in  
656 contrast, we did not attempt to distinguish gravity-fed irrigation from non-center pivot sprinkler  
657 irrigation. Consequently, the datasets as created enabled us to quantify changes in irrigation  
658 extent and any shifts inward center-pivot irrigation. It did not allow us to make estimates of  
659 water consumption or quantify shifts from gravity-fed irrigation to non-center pivot sprinkler  
660 irrigation.

661

## 662 2.6 Analysis

663 Temporal trends in riparian wetness (NDWI anomaly ~~Year~~) were tested for each  
664 riparian reach using the non-parametric Mann-Kendall (MK) test for trends. As the MK test for  
665 trends can be sensitive to temporal autocorrelation (Hamed and Rao, 1998), we used the Durbin-  
666 Watson statistic to test for the presence of temporal autocorrelation in the NDWI anomaly values  
667 of each riparian reach (Table 4). ~~Temporal autocorrelation was found to be significant for the~~  
668 ~~NDWI anomaly data over time in 3 of the 19 riparian reaches, but in all three cases, the~~  
669 ~~autoregressive model (AR1) performed worse than the linear model, as evaluated by comparing~~  
670 ~~Akaike Information Criterion (AICc) values (Hurvich and Tsai, 1989), suggesting that~~  
671 ~~autoregressive models were not appropriate for this analysis (Table 4). However, b~~  
672 ~~Because~~ autocorrelation can inflate trend significance, for these three in reaches where temporal  
673 autocorrelation was present riparian reaches we calculated a modified Mann-Kendall test for  
674 trends that accounts for the autocorrelation structure of the data (Hamed and Rao, 1998).



675 Interannual variability in riparian wetness for a given reach can be expected to be a  
676 function of (1) interannual climate variability and (2) changes in the amount and timing of  
677 anthropogenic water withdrawals or water return flow, while spatial variability in these  
678 relationships can be expected to be a function of landscape characteristics. Temporal variability  
679 in climate and anthropogenic activities could occur both within each reach and upstream of each  
680 reach. Because annual (1984-2016) agricultural and irrigation data were not available for the  
681 entire time series, the influence of water withdrawals was estimated as the residual variance after  
682 modeling the interannual variability in riparian wetness attributable to climate.

683 The NDWI anomaly values were related to climate variables for each riparian reach using  
684 random forest analysis. The random forest analyses were used to quantify the amount of  
685 variation in the NDWI anomalies explained by climate variables and to identify the frequency  
686 (importance) of particular climate variables in predicting NDWI anomalies. Random forest  
687 techniques use bootstrapping to employ hundreds of regression trees and make no prior  
688 assumptions about cause and effect relationships or correlations among variables (Hastie et al.,  
689 2009). Random forest techniques are generally insensitive to multicollinearity; however, the  
690 inclusion of highly correlated variables can deflate both variable importance and the overall  
691 variation explained by the analysis, while the inclusion of many variables can make  
692 interpretation difficult and introduce noise (Murphy et al., 2010). We therefore implemented  
693 variable selection using the *rfUtilities* package in R (Murphy et al., 2010) before running random  
694 forest regressions for each riparian reach with the selected subset of climate variables. To model  
695 growing-season riparian NDWI anomalies we calculated 500 regression trees for each riparian  
696 reach. ~~W~~Although we did not restrict the number of nodes, model overfit was instead limited by  
697 setting the minimum sample size per node to 5. Because of the limited data points per riparian  
698 reach (n=33) model fit was assessed using out of bag (OOB) root mean squared error (RMSE,  
699 70% of points used to train, 30% of points used to validate) using the *randomForest* package in  
700 the R statistical software (Liaw and Wiener, 2015). We found no increase in the OOB error as  
701 more trees were generated (i.e., up to 500 trees). Random forest regression residuals were then  
702 extracted and evaluated for temporal trends not attributable to climate variability (~~NDWI~~  
703 ~~anomaly random forest regression residuals ~ Year~~). Temporal trends in the regression residuals  
704 were tested using the non-parametric MK test for trends. We again used the Durbin-Watson  
705 statistic to test for the presence of temporal autocorrelation in the NDWI anomaly-climate

706 regression residual values of each riparian reach. If temporal autocorrelation was significant, the  
707 modified Mann-Kendall test for trends was used instead.

708 We note that we tested an alternative method in which data for all riparian reaches and  
709 years were combined in a single linear mixed model. ~~Although~~ this approach increased our  
710 sample size (33 years x 19 riparian reaches), but we found that the error in the regression,  
711 specifically the strength of the relationship between the predicted and actual NDWI anomalies,  
712 was uneven between riparian reaches, thereby decreasing our confidence in the analysis of  
713 trends in the residuals. This finding further supported our decision to run a random forest  
714 regression for each riparian reach.

715

## 716 **2.7 Ancillary Spatial Datasets**

717 Landscape characteristics such as topography, geology, and landcover may influence how  
718 riparian vegetation responds to climate variability over time and were therefore also considered.  
719 Between-group differences in landscape characteristics were calculated for riparian reaches that  
720 showed a temporal trend in riparian wetness relative to riparian reaches that showed no temporal  
721 trend in riparian wetness using the non-parametric Mann-Whitney-Wilcoxon Test (or the  
722 Wilcoxon rank sum test) (Cohen, 1988). Variability in topography was quantified as the (1)  
723 elevation coefficient of variation across each 10-digit hydrologic unit code (HUC-10) (Ascione  
724 et al., 2008), as well as the (2) Melton Ruggedness number, which is calculated as the maximum  
725 elevation minus the minimum elevation divided by the area of the hydrological unit (HUC10)  
726 (Melton, 1965), using the USGS National Elevation Dataset (NED) 10 m resolution (Gesch et  
727 al., 2002). The percent of the riparian reach's within reach contributing area that was (1)  
728 evergreen forest, (2) herbaceous vegetation, (3) pasture, and (4) crop was included, as classified  
729 by the National Land Cover Database (NLCD) 2011 (Homer et al., 2015). Soil and geology  
730 characteristics were considered using the minimum water table depth (April-July), bedrock  
731 depth, and soil drainage characteristics, specifically the percent of each riparian reach's  
732 contributing area that is well drained (excessively drained, somewhat excessively drained, well  
733 drained) and poorly drained (very poorly drained, poorly drained). These variables were derived  
734 from the National Resources Conservation Service's Soil Survey Geographic (SSURGO)  
735 database to characterize infiltration capacity (Soil Survey Staff, 2018). Change in developed  
736 (built-up) land, including urban, residential, and commercial land uses was quantified using the

737 “Historical built-up intensity layer (1810-2015, 5-year intervals)” (Leyk and Johannes, 2018).  
738 This dataset quantifies the sum of building areas of all structures per pixel, where pixel size is  
739 250 m by 250 m. Change in built-up intensity was quantified as the change in the sum of  
740 building areas between 2015 and 1985 (m<sup>2</sup>) per river length (m).

741

## 742 **2.8 River Discharge**

743 Riparian corridors are interconnected with its adjacent rivers via longitudinal, lateral, and  
744 vertical fluxes of water (Fritz et al., 2018). To explore the potential relationship between riparian  
745 water storage and river discharge across the UMH Basin, we identified seven USGS stream  
746 gages within the basin with upstream contributing areas ranging between ~3,400 ha and ~25,000  
747 ha. The gages were variable in their position relative to flow regulators such as dams associated  
748 with lakes or reservoirs. The amount of flow regulation enforced by these flow regulators was  
749 unknown and therefore a major point of uncertainty. The Spearman correlation coefficient was  
750 calculated between the monthly river discharge, averaged to June-August, and the riparian  
751 NDWI anomalies for the co-located riparian reach or the riparian reach immediately adjacent to  
752 each gage. We note that a correlation can be indicative of a similar response of both variables to  
753 interannual water availability (e.g., precipitation) as well as potential movement of water across  
754 the river-upland interface. We also evaluated trends in river discharge over time (1984-2016) in  
755 growing-season (June, July, August), as well as autumn (September, October, and November)  
756 and winter (December, January, February) seasons using the MK test for trends. The temporal  
757 trends in river discharge were calculated only to compare with temporal trends in riparian  
758 wetness over the same period. We note that a full trend analysis in river discharge would require  
759 not only utilizing the entire record of river discharge available per gage, but also considering the  
760 potential impact of flow regulation via dams, as well as interannual variability in surface  
761 withdrawals for irrigation, which are closely regulated by Montana State Law (Montana DNRC,  
762 2015).

763

### 764 3. Results

#### 765 3.1 Trends in Riparian Wetness

766 A total of 15,785 ha (157.85 km<sup>2</sup>) of riparian vegetation was delineated along the major  
767 rivers (Fig. 1). River length within each riparian reach ranged from 21 km along the Gallatin  
768 River to 180 km along the Ruby River, and averaged 70 km in length (Table 2, Fig. 1). The total  
769 riparian area analyzed per reach ranged from 26 ha (289 Landsat pixels) along the Black Tail  
770 Deer River to 1771 ha (19,678 Landsat pixels) along the Madison River, and averaged 831 ha  
771 (9,233 Landsat pixels, Table 2). The NDVI and NDWI averaged 0.45 and 0.22, respectively,  
772 across riparian reaches and years (Table 2). All 19 riparian reaches showed an average NDWI of  
773 <0.3 (Table 2), the threshold that is typically used to identify open water (Chatterjee et al., 2005;  
774 Chowdary et al., 2008; McFeeters, 2013).

775 Temporal autocorrelation was found to be significant for the NDWI anomaly data over  
776 time in 3 of the 19 riparian reaches, but in all three cases, the autoregressive model (AR1)  
777 performed worse than the linear model, as evaluated by comparing Akaike Information Criterion  
778 (AICc) values (Hurvich and Tsai, 1989), suggesting that autoregressive models were not  
779 appropriate for this analysis (Table 3). For these three reaches, and three reaches for which the  
780 residuals were found to show temporal autocorrelation, the modified MK test for trends was  
781 used.

782 When we tested for MK trends in growing-season (June-August) riparian wetness over  
783 time, 8 of the 19 riparian reaches showed a significant decline over time in growing-season  
784 NDWI anomalies (5 riparian reaches  $p < 0.05$ , 3 riparian reaches  $p < 0.1$ ) (Table 34, Fig. 4). The  
785 BVHR3 and BVHR4 riparian reaches that tested positive for autocorrelation still showed a  
786 significant drying trend after using the modified MK test. Interannual variability in climate can  
787 be expected to explain a portion of the interannual variability in riparian wetness. Across all 19  
788 reaches, climate variables explained 23 to 69% (averaged 47%) of the interannual variability in  
789 riparian NDWI anomalies (Table 3). However, basin-wide, the climate variables did not show a  
790 temporal trend over same period (1984-2016), apart from the VPD maximum (summer) which  
791 showed an increasing trend ( $p < 0.1$ ) (Table 4). Drought indices, in particular the PDSI (summer,  
792 selected in 15 regressions and annual, selected in 13 regressions), but also the Palmer Z-index  
793 (annual and spring both selected in 9 regressions), as well as annual precipitation (selected in 11

794 regressions) were the variables most frequently selected for inclusion in the random forest  
795 analyses (Table 4).

796 For the eight riparian reaches that showed a temporal trend in NDWI anomalies (Figure  
797 4a) the NDWI anomaly-climate regression residuals also showed a significant negative trend  
798 over time, indicating that declines in riparian wetness cannot be attributed solely to climate  
799 variability (7 riparian reaches  $p < 0.05$ , 1 riparian reach  $p < 0.1$ , Table 3, Fig. 4b). One additional  
800 riparian reach along the Jefferson River (JR3) did not show a significant trend in NDWI  
801 anomalies but did show a significant negative trend in the NDWI anomaly-climate regression  
802 residuals ( $p < 0.05$ , Table 3, Fig. 4). The riparian reach BVHR1 also showed a significant negative  
803 trend in the NDWI anomaly-climate regression residuals when tested using the modified MK  
804 test. Data for two of the riparian reaches at the basin outlet (JR1, GR1) are shown in Fig. 5 and  
805 Fig. 6, respectively. Both show a decline in NDWI anomalies over time, with the slope of the  
806 relationship steepening after the removal of the climate component (Fig. 5 and 6).

807  
808

809 **Table 3.** Temporal trends in per reach riparian Normalized Difference Wetness Index (NDWI,  
810 June, July, August) anomalies using the Mann-Kendall (MK) test for trends. The Durbin-Watson  
811 (DW) statistic was used to test for the presence of temporal autocorrelation. NDWI anomalies  
812 were modeled against climate variables using random forest regressions. The temporal trends in  
813 the random forest regression residuals were evaluated using MK test for trends. A modification  
814 of the MK (Hamed and Rao, 1998) was used for the reaches where the DW statistic was  
815 significant. RMSE: root mean square error, \*:  $p < 0.1$ , \*\*:  $p < 0.05$ .

| <u>Reach Code</u> | <u>River</u>          | <u>NDWI anomaly DW statistic</u> | <u>NDWI anomaly MK tau</u> | <u>Random forest R<sup>2</sup> value</u> | <u>Random Forest RMSE</u> | <u>Residual DW statistics</u> | <u>Residual MK tau</u> |
|-------------------|-----------------------|----------------------------------|----------------------------|------------------------------------------|---------------------------|-------------------------------|------------------------|
| JR1               | Jefferson River       | 1.56                             | -0.22*                     | 0.65**                                   | 0.02                      | 1.74                          | -0.28**                |
| JR2               | Jefferson River       | 2.13                             | -0.10                      | 0.48**                                   | 0.03                      | 2.58                          | -0.15                  |
| JR3               | Jefferson River       | 1.75                             | -0.20                      | 0.66**                                   | 0.02                      | 2.13                          | -0.27**                |
| BVHR1             | Beaverhead River      | 1.51                             | -0.35**                    | 0.53**                                   | 0.03                      | 1.36**                        | -0.27**                |
| BVHR2             | Beaverhead River      | 1.77                             | -0.08                      | 0.56**                                   | 0.03                      | 1.84                          | -0.03                  |
| BVHR3             | Beaverhead River      | 1.78                             | -0.46**                    | 0.43**                                   | 0.05                      | 2.35                          | -0.38**                |
| BVHR4             | Beaverhead River      | 1.40**                           | -0.36**                    | 0.47**                                   | 0.04                      | 1.51                          | -0.36**                |
| RRR               | Red Rock River        | 1.63                             | -0.20                      | 0.32**                                   | 0.03                      | 1.61                          | -0.16                  |
| BTDR              | Black Tail Deer River | 1.57                             | -0.35**                    | 0.48**                                   | 0.04                      | 1.87                          | -0.30**                |
| RR                | Ruby River            | 1.84                             | -0.21*                     | 0.34**                                   | 0.03                      | 2.05                          | -0.21*                 |
| BHR1              | Big Hole River        | 1.64                             | -0.16                      | 0.64**                                   | 0.02                      | 1.68                          | -0.15                  |
| BHR2              | Big Hole River        | 2.33                             | 0.06                       | 0.47**                                   | 0.02                      | 2.05                          | 0.16                   |
| BHR3              | Big Hole River        | 2.01                             | -0.06                      | 0.69**                                   | 0.02                      | 2.37                          | -0.03                  |
| BHR4              | Big Hole River        | 2.13                             | -0.02                      | 0.28**                                   | 0.05                      | 2.88**                        | -0.08                  |
| MR1               | Madison River         | 2.18                             | -0.23*                     | 0.54**                                   | 0.02                      | 2.32                          | -0.26**                |
| MR2               | Madison River         | 2.47                             | -0.10                      | 0.58**                                   | 0.02                      | 2.40                          | -0.05                  |
| GR1               | Gallatin River        | 2.02                             | -0.38**                    | 0.37**                                   | 0.03                      | 2.23                          | -0.53**                |
| GR2               | Gallatin River        | 1.97                             | -0.16                      | 0.23**                                   | 0.02                      | 1.68                          | -0.10                  |
| EGR               | East Gallatin River   | 2.68*                            | -0.11                      | 0.46**                                   | 0.02                      | 2.69*                         | -0.16                  |

816

817 **Table 4.** Climate variables considered in the analysis to represent interannual variability in conditions. The 25<sup>th</sup>, 50<sup>th</sup>, and 75<sup>th</sup> quartile  
818 are shown to indicate the variability in the per-riparian reach values included in the random forest (RF) regressions (n=19). The  
819 frequency of variable selection for inclusion in the random forest regressions is also shown. When tested at a basin-scale for the time  
820 period of 1984-2016, no climate variables showed a significant temporal trend except summer vapor pressure deficit (\* =  $p < 0.1$ ).  
821 PRISM: Parameter-elevation Regressions on Independent Slopes Model, SNOTEL: snow telemetry, NOAA: National Oceanic and  
822 Atmospheric Administration, summer: (June, July, August), spring: (March, April, May)

| <u>Climate Variables</u>                                 | <u>Source</u> | <u>25th<br/>quartile</u> | <u>50th<br/>quartile</u> | <u>75th<br/>quartile</u> | <u>Temporal<br/>Trend (tau)</u> | <u>Frequency<br/>selected for<br/>inclusion in RF<br/>regressions</u> |
|----------------------------------------------------------|---------------|--------------------------|--------------------------|--------------------------|---------------------------------|-----------------------------------------------------------------------|
| <u>Annual precipitation (mm)</u>                         | <u>PRISM</u>  | <u>456.1</u>             | <u>527.1</u>             | <u>620.4</u>             | <u>-0.03</u>                    | <u>11</u>                                                             |
| <u>1-year lagged annual precipitation (mm)</u>           | <u>PRISM</u>  | <u>458.9</u>             | <u>532.7</u>             | <u>625.4</u>             | <u>-0.03</u>                    | <u>2</u>                                                              |
| <u>Precipitation (spring) (mm)</u>                       | <u>PRISM</u>  | <u>48.1</u>              | <u>56.2</u>              | <u>68.0</u>              | <u>-0.004</u>                   | <u>1</u>                                                              |
| <u>Precipitation (summer) (mm)</u>                       | <u>PRISM</u>  | <u>32.7</u>              | <u>43.8</u>              | <u>58.1</u>              | <u>-0.13</u>                    | <u>4</u>                                                              |
| <u>Annual snowfall (snow water equivalent (SWE), mm)</u> | <u>SNOTEL</u> | <u>938.6</u>             | <u>1113.4</u>            | <u>1421.0</u>            | <u>-0.18 - 0.16</u>             | <u>1</u>                                                              |
| <u>Spring snowfall (March-June) (SWE, mm)</u>            | <u>SNOTEL</u> | <u>169.3</u>             | <u>264.7</u>             | <u>402.3</u>             | <u>-0.18 - 0.15</u>             | <u>7</u>                                                              |
| <u>Maximum temperature (spring) (°C)</u>                 | <u>PRISM</u>  | <u>9.7</u>               | <u>11.1</u>              | <u>12.4</u>              | <u>-0.03</u>                    | <u>3</u>                                                              |
| <u>Maximum temperature (summer) (°C)</u>                 | <u>PRISM</u>  | <u>23.4</u>              | <u>24.6</u>              | <u>25.8</u>              | <u>-0.03</u>                    | <u>1</u>                                                              |
| <u>Minimum temperature (spring) (°C)</u>                 | <u>PRISM</u>  | <u>-4.2</u>              | <u>-3.1</u>              | <u>-2.0</u>              | <u>-0.004</u>                   | <u>0</u>                                                              |
| <u>Minimum temperature (summer) (°C)</u>                 | <u>PRISM</u>  | <u>5.3</u>               | <u>6.4</u>               | <u>7.5</u>               | <u>-0.13</u>                    | <u>0</u>                                                              |
| <u>Vapor Pressure Deficit maximum (spring)</u>           | <u>PRISM</u>  | <u>7.1</u>               | <u>8.1</u>               | <u>9.0</u>               | <u>0.07</u>                     | <u>8</u>                                                              |
| <u>Vapor Pressure Deficit maximum (summer)</u>           | <u>PRISM</u>  | <u>18.4</u>              | <u>20.5</u>              | <u>22.7</u>              | <u>0.21*</u>                    | <u>6</u>                                                              |
| <u>Palmer Z-Index (annual)</u>                           | <u>NOAA</u>   | <u>-0.5</u>              | <u>-0.3</u>              | <u>0.3</u>               | <u>-0.07</u>                    | <u>9</u>                                                              |
| <u>Palmer Drought Severity Index (annual)</u>            | <u>NOAA</u>   | <u>-1.6</u>              | <u>-0.2</u>              | <u>0.8</u>               | <u>-0.11</u>                    | <u>13</u>                                                             |
| <u>Palmer Z-Index (spring)</u>                           | <u>NOAA</u>   | <u>-0.9</u>              | <u>0.2</u>               | <u>0.8</u>               | <u>0.02</u>                     | <u>9</u>                                                              |
| <u>Palmer Drought Severity Index (spring)</u>            | <u>NOAA</u>   | <u>-1.8</u>              | <u>-0.3</u>              | <u>1.1</u>               | <u>-0.05</u>                    | <u>8</u>                                                              |
| <u>Palmer Z-Index (summer)</u>                           | <u>NOAA</u>   | <u>-1.5</u>              | <u>-0.4</u>              | <u>1.0</u>               | <u>-0.15</u>                    | <u>5</u>                                                              |
| <u>Palmer Drought Severity Index (summer)</u>            | <u>NOAA</u>   | <u>-2.4</u>              | <u>-0.5</u>              | <u>1.3</u>               | <u>-0.14</u>                    | <u>15</u>                                                             |

823



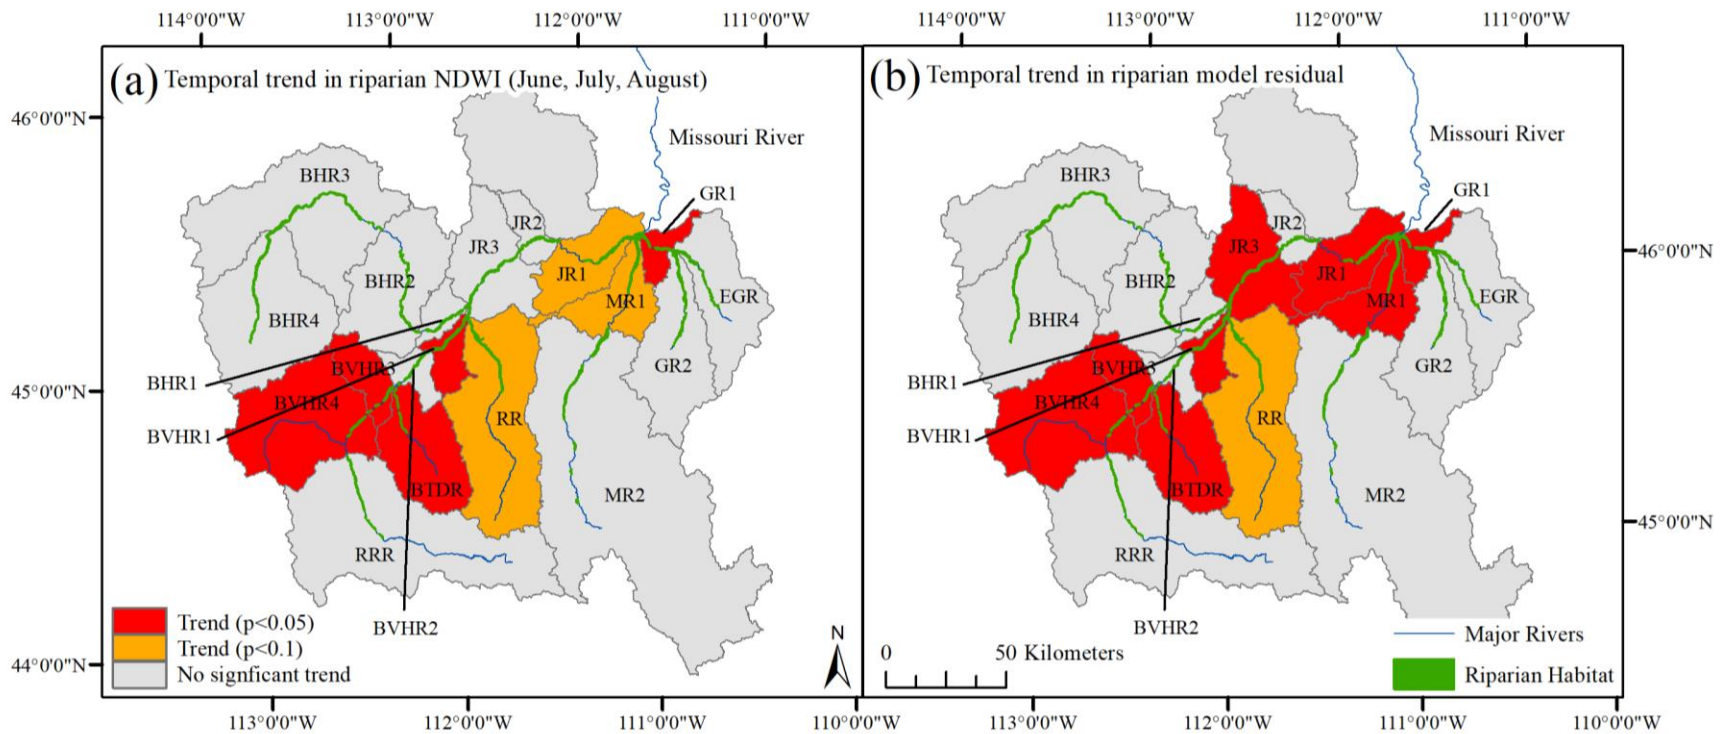

824  
 825  
 826  
 827  
 828  
 829

**Figure 4.** (a) The spatial distribution of riparian reaches found to show a significant decreasing trend ( $p < 0.1$  or  $p < 0.05$ ) in riparian wetness using the Normalized Difference Wetness Index (NDWI, June, July, August) anomalies, and (b) the spatial distribution of riparian reaches found to show a significant trend in NDWI anomaly-climate regression residuals, or the variance in NDWI anomalies not explained by climate variables. All trends were negative, indicating a drying over time.



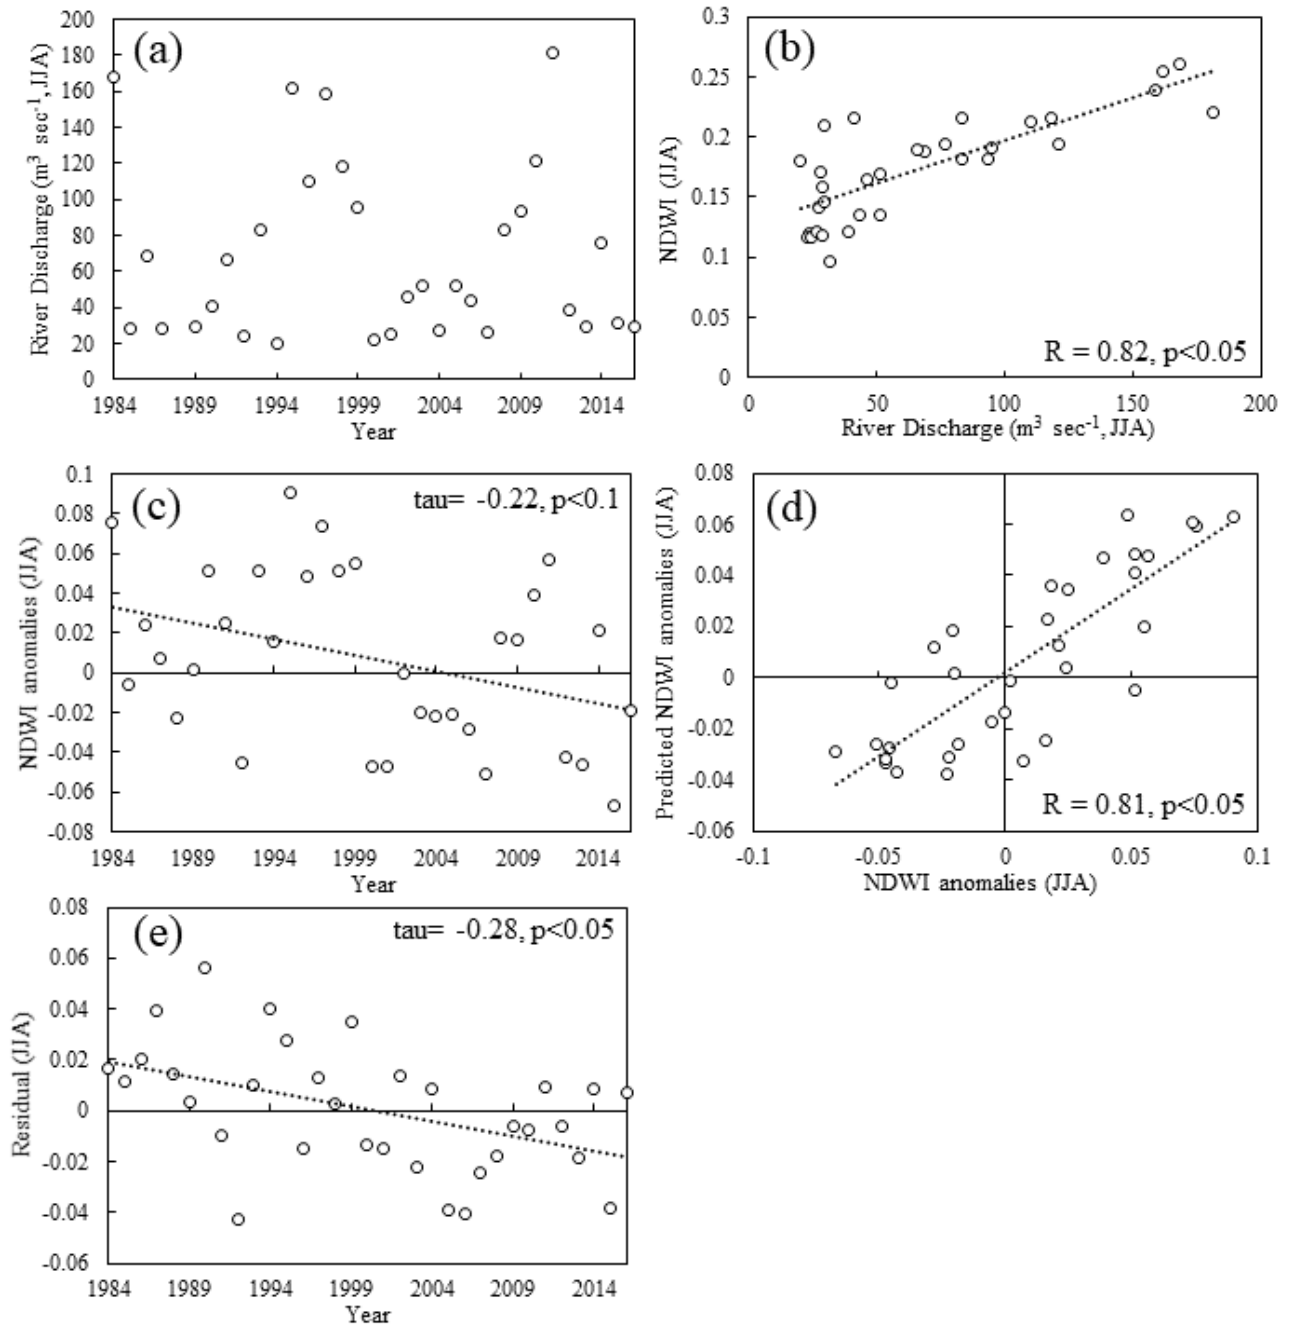

830  
 831 **Figure 5.** Statistics for the Jefferson River riparian reach at the basin outlet (JR1) including, (a)  
 832 variability in June, July, August (JJA) river discharge over time (Station ID: 6036650), (b)  
 833 relationship between the Normalized Difference Wetness Index (NDWI) and river discharge, (c)  
 834 trend in NDWI anomalies over time, (d) correlation between NDWI anomalies and predicted  
 835 NDWI anomalies, and (e) trend in NDWI anomalies-climate regression residuals over time.  
 836

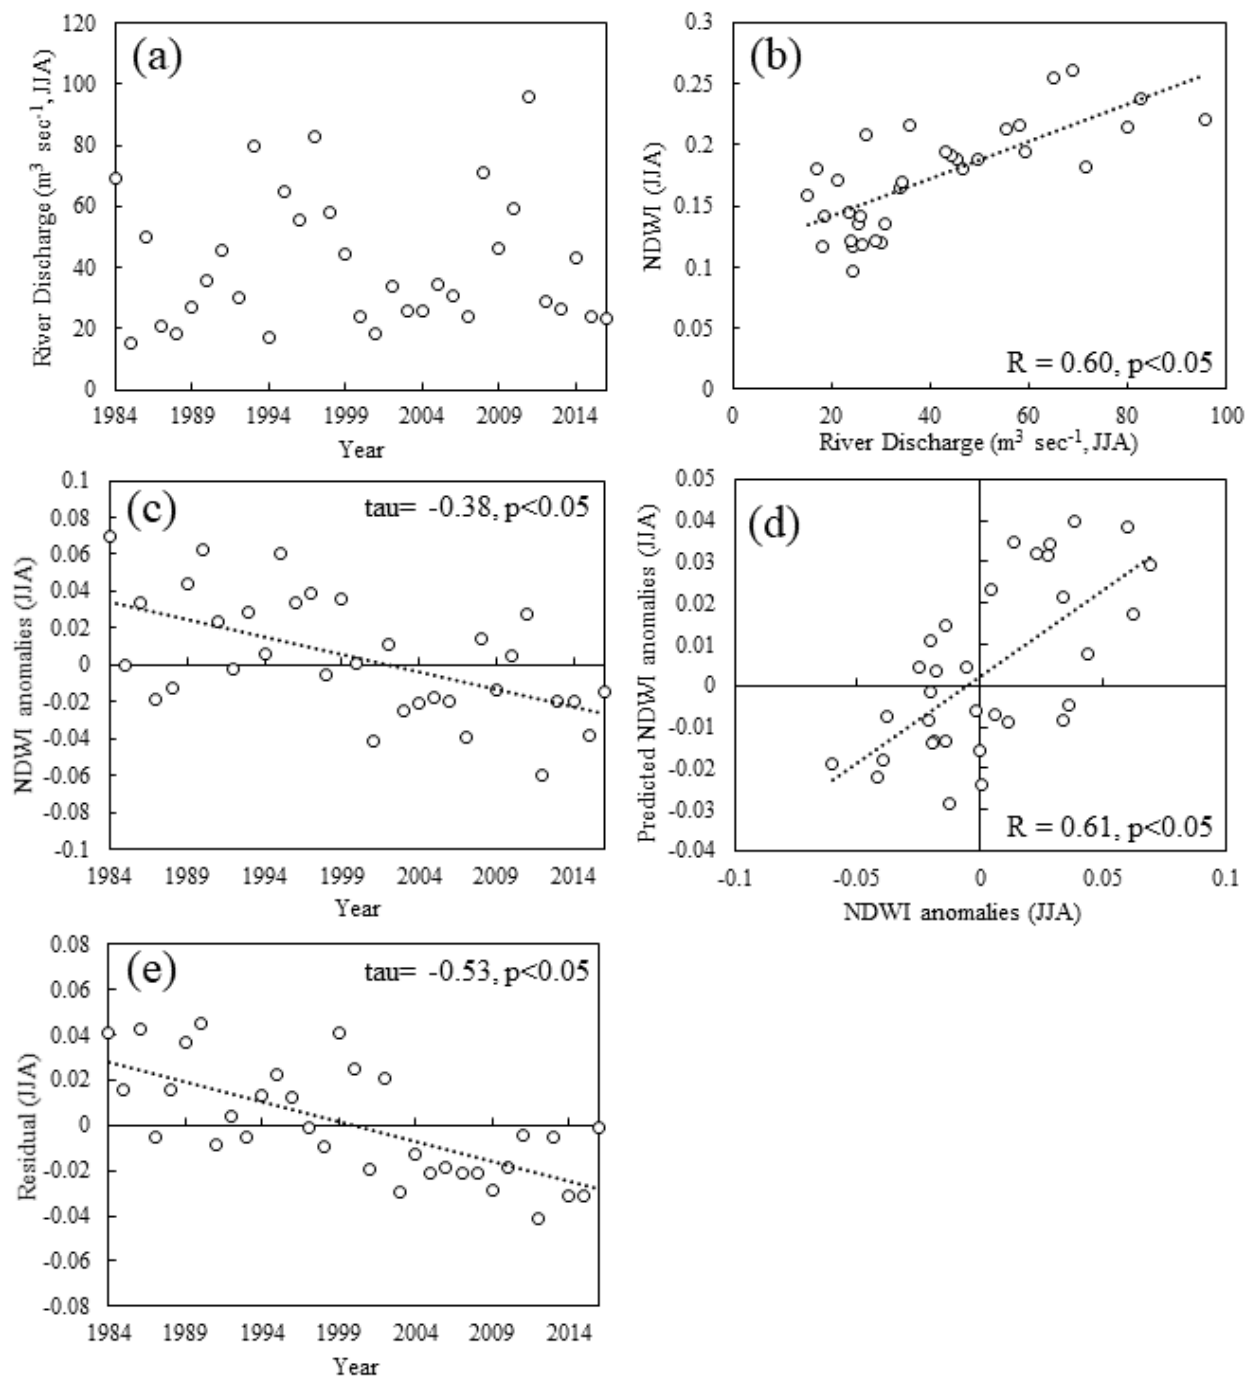

838

839

840

841

842

843

844

845

**Figure 6.** Statistics for the Gallatin River riparian reach downstream of the East Gallatin River (GR1) including, (a) variability in river discharge over time (Station ID: 6052500), (b) relationship between the Normalized Difference Wetness Index (NDWI) and river discharge, (c) trend in NDWI anomalies over time, (d) correlation between NDWI anomalies and predicted NDWI anomalies, and (e) trend in NDWI anomalies-climate regression residuals over time.

### 846 3.2 Trends in Agriculture and Water Withdrawals

847 Agriculture across the UMH Basin is spatially distributed along the major rivers (Fig.  
848 2a). Using the endpoint (1985/86 and 2016/17) agriculture dataset, the largest amounts of  
849 agriculture occurred along the Gallatin River, Beaverhead River, Ruby River, and the most  
850 upstream reach of the Big Hole River (Fig. 7a). The effect of water withdrawals can be expected  
851 to accumulate downstream, therefore the total ~~amount-hectares~~ of upstream agriculture was  
852 highest along the Beaverhead River, Jefferson River and downstream portion of the Gallatin  
853 River (Fig. 7b).

854 Over the study period the total ~~amount of agriculture-hectares~~ of land in active  
855 ~~agricultural production~~ was relatively stable (~~4% increase~~ increased by 10.5% (Table 5). The  
856 ~~largest increases in total hectares~~ were observed along the Gallatin and Jefferson Rivers, while  
857 ~~Although we did observe a minor declines~~ in total ~~agriculture-hectares~~ were observed across  
858 the most upstream portion of the basin, ~~and the largest increases in total agriculture along the~~  
859 ~~Gallatin and Jefferson Rivers~~ (Fig. 7 and 8). ~~In contrast,~~ We also observed changes in irrigation  
860 methods ~~saw much greater changes~~. The basin-wide area irrigated using center pivot increased  
861 ~~from 8961 ha (9% of irrigated area) to 54,295 ha (50% of irrigated area), while non-center pivot~~  
862 ~~(gravity, non-center pivot sprinklers) decreased from 89,049 ha (91% of irrigated area) to 54,009~~  
863 ~~ha (50% of irrigated area) (Table 5).~~ We observed a five-fold (506%) increase in the amount of  
864 agriculture using center pivot irrigation, and a 39% decrease in the amount of agriculture using  
865 non-center pivot irrigation (Table 6). Aerial imagery shows examples of the conversion to center  
866 pivot irrigation between 1985 and 2017 (Fig. 8). The percent change in the proportion of  
867 agricultural land area using center pivot irrigation ranged from 0% to +58% across the reaches,  
868 with the biggest conversions along the Jefferson, Beaverhead, Madison and Black Tail Deer  
869 Rivers (Table 5).

870 The conversion of irrigation methods could help explain the drying trends. Riparian  
871 reaches that saw a significant decline in riparian wetness, even after accounting for variability  
872 explained by climate, showed several differences relative to riparian reaches where no such  
873 temporal trend was observed. First these drying reaches showed a greater average increase  
874 (within and upstream from the reach) in center pivot irrigation area (+11,459 ha on average  
875 relative to +5,634 ha) over the period (Mann-Whitney-Wilcoxon,  $p < 0.05$ ) (Table 5). These  
876 reaches also showed a greater reach-scale change in the fraction center pivot irrigation (+46%

877 average relative to +32%,  $p < 0.1$ ) as well as a greater change in the fraction of center pivot  
878 irrigation across a reach's contributing area (42% average relative to 27%,  $p < 0.1$ ) (Table 5).

879 The response of a riparian reach to changes in water withdrawals and irrigation method  
880 may also depend on other landscape characteristics such as soil, geology and topography.  
881 Riparian reaches that showed a significant non-climate related drying over time showed a higher  
882 percent well-drained soils ( $p < 0.05$ ) and higher Melton Ruggedness number (greater range in  
883 elevation per area,  $p < 0.05$ , Table 6). In addition, although irrigation dominates water  
884 consumption across the basin, we note that development has increased around Bozeman, along  
885 the East Gallatin River, over the study period, while minimal increases in development were  
886 found elsewhere (Fig. 7F).

887 ~~T~~Although the examples in Fig. 5 and Fig. 6 fit the pattern of a shift towards center pivot  
888 irrigation and a corresponding drying trend in riparian wetness. Other reaches, however, showed  
889 less intuitive patterns. For instance, all reaches that showed a significant drying trend also  
890 showed a substantial increase in the fraction of center pivot agriculture, ranging from 35% to  
891 64%, except BVHR4, which showed a significant drying trend without an associated increase in  
892 center pivot agriculture (a 24% increase in center pivot agriculture, but the lowest total ha of  
893 center pivot irrigation in 2016/17 of any riparian reach). The NDWI anomalies and NDWI  
894 anomalies-climate residuals shown in Fig. 9a and 9b indicate that this stretch of the Beaverhead  
895 River (BVHR4), which is immediately downstream from the Clark Canyon Reservoir,  
896 experienced a steep decrease in riparian wetness in 2002, with no visible trend before or after  
897 2002. Such a clear steep decrease, however, was not observed in the closest stream gage (Station  
898 ID: 06016000) downstream of this riparian reach. In contrast, one riparian reach on the  
899 Beaverhead River further downstream (BVHR2) showed a 54% increase in the fraction of center  
900 pivot agriculture, as well as a decrease in the total hectares of irrigated agriculture over the study  
901 period ( $-48.5 \text{ ha km}^{-1}$  river length), with no drying trend (Fig. 9c and 9d), even though reaches  
902 upstream and downstream of BVHR2 show significant drying trends. With the landscape  
903 characteristics considered we were again unable to determine why this riparian reach was more  
904 resilient than other riparian reaches of this river.

905

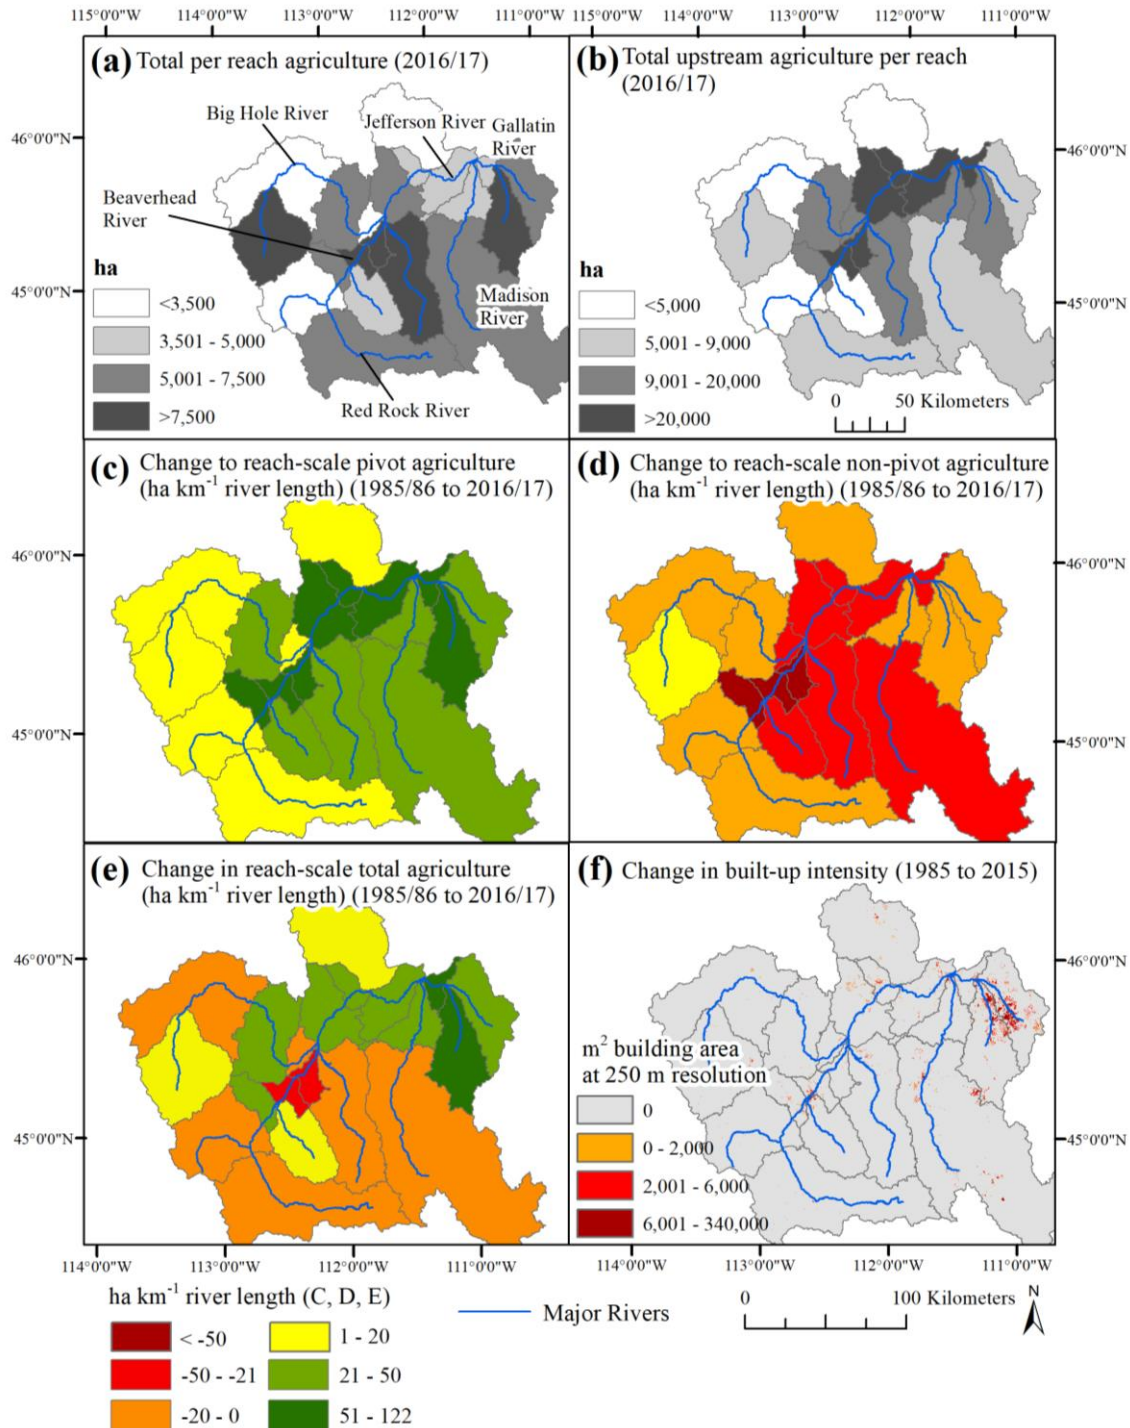

906  
 907 **Figure 7.** Changes in agricultural and development characteristics across Upper Missouri River  
 908 Headwaters Basin between 1985/86 and 2016/17 including, (a) total per reach agriculture  
 909 (2016/17), (b) total agriculture within and upstream of each reach (i.e., accumulated ag)  
 910 (2016/2017), (c) change in the extent of center pivot irrigation to reach-scale abundance of center  
 911 pivot irrigated agriculture (1985/86 to 2016/17), (d) change to reach-scale abundance of in the  
 912 extent of non-pivot irrigated agriculture (1985/86 to 2016/17), (e) change in total per reach

913 agriculture (1985/86 to 2016/17), and (f) change in ~~buil~~built-up intensity~~-up intensity~~, defined as  
914 the summed building area at 250 m resolution (1985 to 2015).



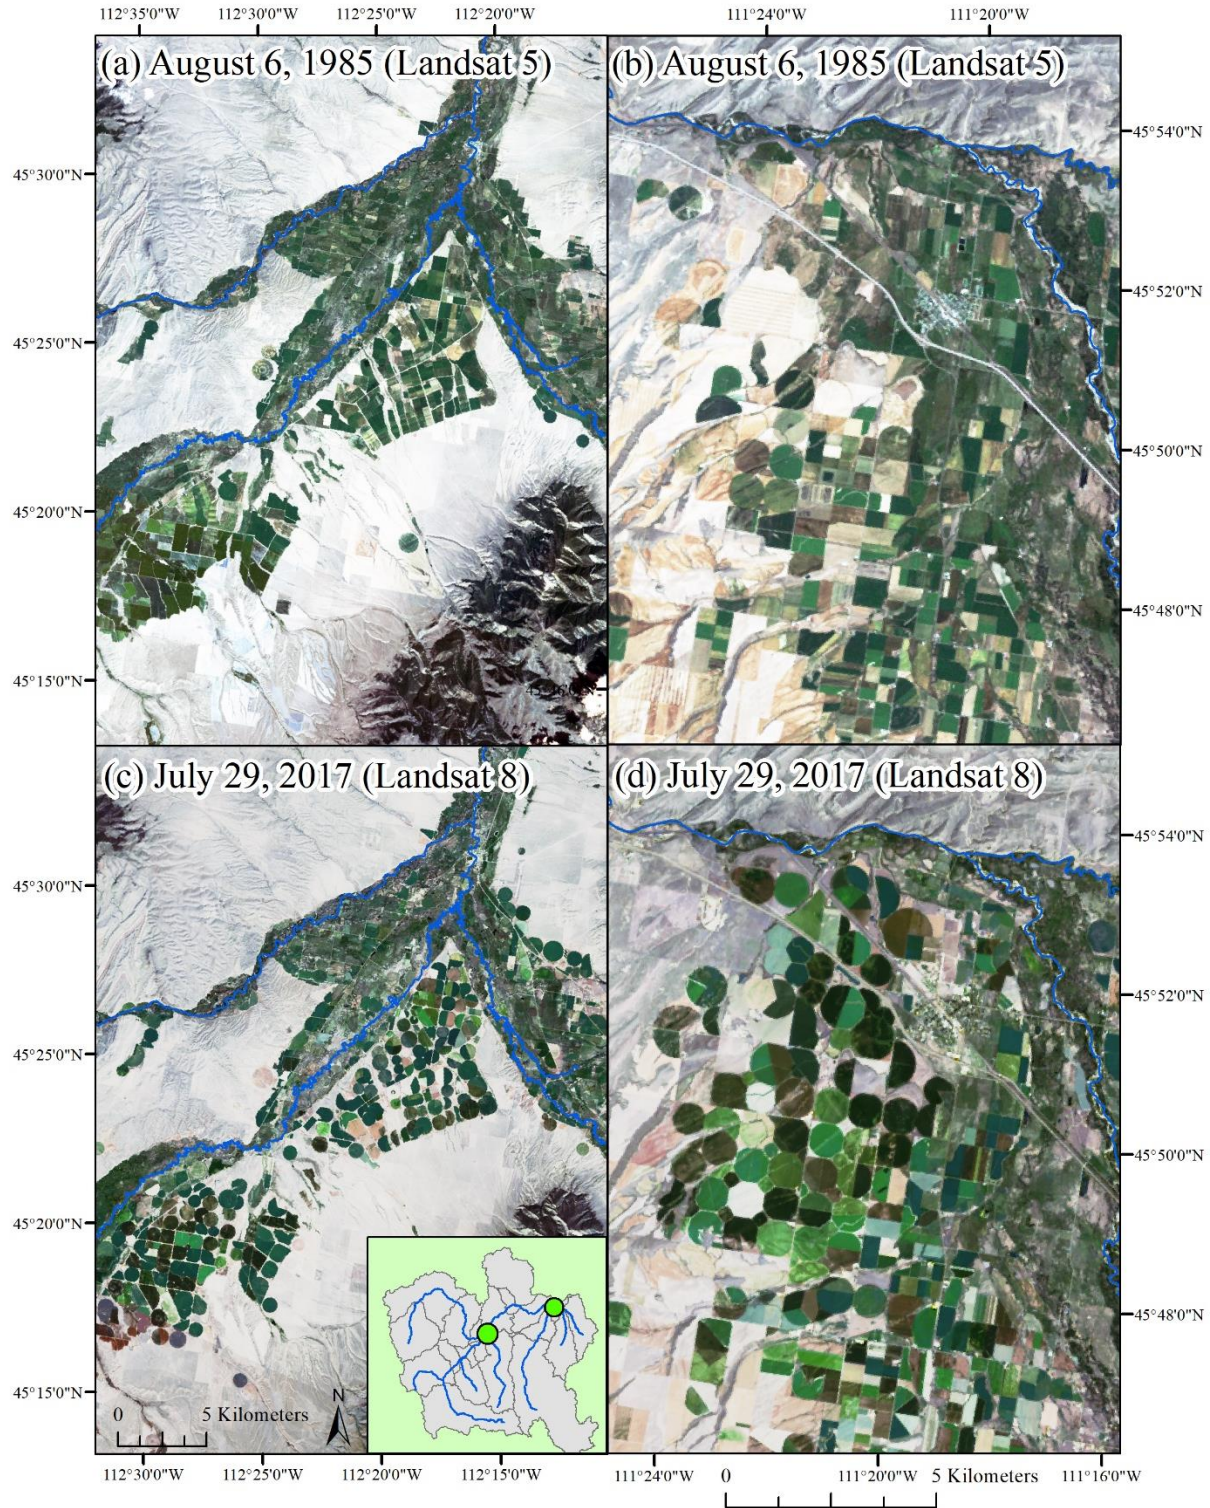

915  
 916 **Figure 8.** Examples of areas showing a shift in irrigation technique over the past 30 years across  
 917 the Upper Missouri River Headwaters Basin including examples at the confluence of the  
 918 Beaverhead (center), Big Hole (left), and Ruby River (right), shown in (a) and (c), as well as  
 919 examples along Gallatin River shown in (b) and (d).

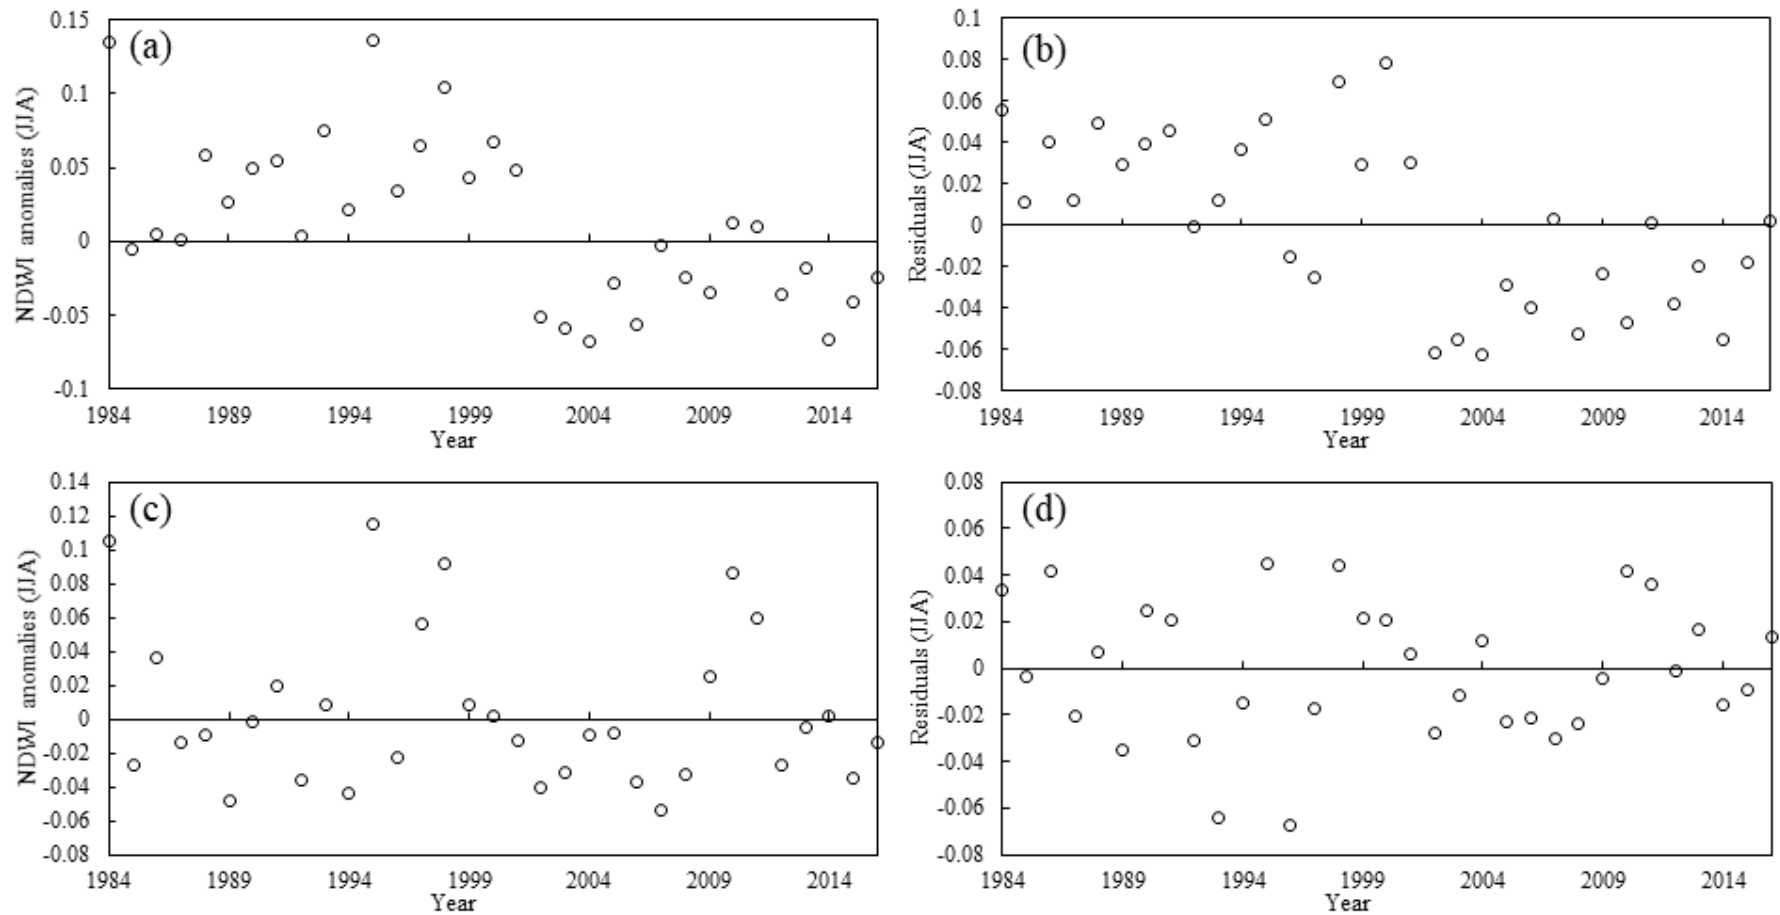

920  
 921 **Figure 9.** The Beaverhead River (BVHR4) (a) NDWI anomalies over time, (b) NDWI anomalies-climate regression residuals over  
 922 time, and the Beaverhead River (BVHR2), (c) NDWI anomalies over time, (d) NDWI anomalies-climate regression residuals over  
 923 time. The MK test for trends was significant ( $p < 0.05$ ) for (a) and (b), but not significant for (c) and (d). JJA: June, July, August.  
 924  
 925



926 **Table 5.** The per reach abundance of irrigated agriculture (IrAg) at the two ends of the time period considered (1985/86 and 2016/17).  
 927 Irrigation method was identified as center pivot agriculture or non-center pivot agriculture based on field shape. Accumulated  
 928 (accum.) ag is defined as the summed area of agriculture across the total contributing area of each reach (e.g., GR1 = agriculture area  
 929 in GR1, GR2 and EGR). Riparian reaches that showed a significant non-climate related drying over time are shaded gray. ‡:  
 930 headwater reach, \*:  $p < 0.1$ , \*\*:  $p < 0.05$ .

| <u>Reach Code</u>  | <u>River</u>                         | <u>Center Pivot Ir (1985/86, ha)</u> | <u>Non-Center Pivot Ir (1985/86, ha)</u> | <u>Center Pivot Ir (2016/17, ha)</u> | <u>Non-Center Pivot Ir (2016/17, ha)</u> | <u>Change in Total Ir (ha)</u> | <u>Change in Total Accum. Ir (ha)</u> | <u>Reach Change in Percent Center Pivot Ir (%)</u> | <u>Accum. Change in Percent Center Pivot Ir (%)</u> | <u>Accum. Increase in Center Pivot Ir (ha)</u> |
|--------------------|--------------------------------------|--------------------------------------|------------------------------------------|--------------------------------------|------------------------------------------|--------------------------------|---------------------------------------|----------------------------------------------------|-----------------------------------------------------|------------------------------------------------|
| JR1                | Jefferson River                      | 571                                  | 2365                                     | 3444                                 | 1027                                     | 1535                           | 7188                                  | 58                                                 | 41                                                  | 31447                                          |
| JR2                | Jefferson River                      | 539                                  | 2544                                     | 2344                                 | 1301                                     | 562                            | 5653                                  | 47                                                 | 39.8                                                | 28574                                          |
| JR3                | Jefferson River                      | 601                                  | 2986                                     | 3093                                 | 1998                                     | 1504                           | 5091                                  | 44                                                 | 39.4                                                | 26769                                          |
| BVHR1              | Beaverhead River                     | 727                                  | 9034                                     | 5631                                 | 2226                                     | -1904                          | -3054                                 | 64                                                 | 51.3                                                | 17527                                          |
| BVHR2              | Beaverhead River                     | 196                                  | 11794                                    | 5794                                 | 4531                                     | -1665                          | -1150                                 | 54                                                 | 47.5                                                | 12623                                          |
| BVHR3              | Beaverhead River                     | 810                                  | 3254                                     | 3387                                 | 1772                                     | 1095                           | 312                                   | 46                                                 | 38.9                                                | 4740                                           |
| BVHR4 <sup>‡</sup> | Beaverhead River                     | 0                                    | 1420                                     | 330                                  | 1039                                     | -51                            | -783                                  | 24                                                 | 32                                                  | 2163                                           |
| RRR <sup>‡</sup>   | Red Rock River                       | 535                                  | 5754                                     | 2368                                 | 3189                                     | -732                           | -732                                  | 34                                                 | 34                                                  | 1833                                           |
| BTDR <sup>‡</sup>  | Black Tail Deer River                | 1066                                 | 3138                                     | 3351                                 | 1056                                     | 203                            | 203                                   | 51                                                 | 51                                                  | 2285                                           |
| RR <sup>‡</sup>    | Ruby River                           | 540                                  | 10414                                    | 4852                                 | 5739                                     | -363                           | -363                                  | 41                                                 | 41                                                  | 4312                                           |
| BHR1               | Big Hole River                       | 215                                  | 1780                                     | 768                                  | 1029                                     | -198                           | 1581                                  | 32                                                 | 13.7                                                | 2438                                           |
| BHR2               | Big Hole River                       | 0                                    | 3992                                     | 1854                                 | 3789                                     | 1651                           | 1779                                  | 33                                                 | 11.8                                                | 1885                                           |
| BHR3               | Big Hole River                       | 52                                   | 3174                                     | 83                                   | 2515                                     | -628                           | 128                                   | 2                                                  | 0.3                                                 | 31                                             |
| BHR4               | Big Hole River                       | 0                                    | 6868                                     | 0                                    | 7624                                     | 756                            | 756                                   | 0                                                  | 0                                                   | 0                                              |
| MR1                | Madison River                        | 909                                  | 1445                                     | 2848                                 | 1020                                     | 1514                           | 196                                   | 35                                                 | 50.1                                                | 4785                                           |
| MR2 <sup>‡</sup>   | Madison River                        | 1282                                 | 5620                                     | 4128                                 | 1456                                     | -1318                          | -1318                                 | 55                                                 | 55                                                  | 2846                                           |
| GR1                | Gallatin River                       | 441                                  | 1957                                     | 3438                                 | 1494                                     | 2534                           | 8333                                  | 51                                                 | 37.7                                                | 9102                                           |
| GR2 <sup>‡</sup>   | Gallatin River                       | 221                                  | 8143                                     | 4407                                 | 8133                                     | 4176                           | 4176                                  | 33                                                 | 33                                                  | 4186                                           |
| EGR <sup>‡</sup>   | East Gallatin River                  | 256                                  | 3367                                     | 2175                                 | 3071                                     | 1623                           | 1623                                  | 34                                                 | 34                                                  | 1919                                           |
|                    | <b>Total</b>                         | <b>8961 (9%)</b>                     | <b>89049 (91%)</b>                       | <b>54295 (50%)</b>                   | <b>54009 (50%)</b>                       | <b>10294 (+10.5%)</b>          | -                                     | -                                                  | -                                                   | -                                              |
|                    | <u>Mann-Whitney-Wilcoxon p-value</u> | -                                    | -                                        | -                                    | -                                        | 0.66                           | 0.97                                  | 0.09*                                              | 0.07*                                               | 0.04**                                         |

932 **Table 6.** Characteristics of riparian reach contributing areas including median water table depth (m), median bedrock depth (m),  
 933 percent well-drained (or very well drained) soil, percent poorly (or very poorly) drained soil, elevation coefficient of variation (CV),  
 934 and Melton Ruggedness number. The Mann-Whitney-Wilcoxon test was used to calculate a measure of the difference (or lack of)  
 935 between riparian reaches that showed a significant non-climate related drying over time (shaded gray), and riparian reaches that  
 936 showed no such pattern, with two asterisks indicating a significant difference ( $p < 0.05$ ) between the two groups.

| Reach Code                       | River                 | Water Table Depth (median) | Bed Rock Depth (median) | Well Drained (%) | Poorly Drained (%) | Elevation CV | Melton Ruggedness Number |
|----------------------------------|-----------------------|----------------------------|-------------------------|------------------|--------------------|--------------|--------------------------|
| JR1                              | Jefferson River       | 84                         | 46                      | 92               | 3                  | 20           | 2.0                      |
| JR2                              | Jefferson River       | 54                         | 41                      | 87               | 4                  | 13           | 3.0                      |
| JR3                              | Jefferson River       | 54                         | 36                      | 89               | 2                  | 22           | 1.4                      |
| BVHR1                            | Beaverhead River      | 54                         | 41                      | 91               | 3                  | 12           | 3.5                      |
| BVHR2                            | Beaverhead River      | 61                         | 41                      | 81               | 6                  | 7            | 2.3                      |
| BVHR3                            | Beaverhead River      | 45                         | 46                      | 92               | 2                  | 15           | 3.0                      |
| BVHR4                            | Beaverhead River      | 80                         | 46                      | 96               | 2                  | 10           | 3.4                      |
| RRR                              | Red Rock River        | 15                         | 46                      | 90               | 4                  | 13           | 1.2                      |
| BTDR                             | Black Tail Deer River | 84                         | 46                      | 91               | 1                  | 17           | 3.7                      |
| RR                               | Ruby River            | 54                         | 48                      | 93               | 3                  | 20           | 1.9                      |
| BHR1                             | Big Hole River        | 54                         | 41                      | 99               | 0                  | 10           | 3.1                      |
| BHR2                             | Big Hole River        | 31                         | 41                      | 93               | 2                  | 18           | 1.0                      |
| BHR3                             | Big Hole River        | 15                         | 38                      | 91               | 4                  | 13           | 0.8                      |
| BHR4                             | Big Hole River        | 15                         | 40                      | 86               | 5                  | 10           | 1.0                      |
| MR1                              | Madison River         | 46                         | 48                      | 92               | 4                  | 16           | 2.2                      |
| MR2                              | Madison River         | 54                         | 64                      | 60               | 2                  | 15           | 0.3                      |
| GR1                              | Gallatin River        | 46                         | 41                      | 92               | 3                  | 11           | 3.0                      |
| GR2                              | Gallatin River        | 84                         | 48                      | 84               | 3                  | 24           | 1.3                      |
| EGR                              | East Gallatin River   | 84                         | 41                      | 83               | 3                  | 21           | 1.3                      |
| Mann-Whitney-Wilcoxon $p$ -value |                       | 0.45                       | 0.37                    | 0.04**           | 0.21               | 0.51         | 0.02**                   |

937

### 938 **3.3 Trends in River Discharge**

939 Growing-season riparian NDWI anomalies were significantly correlated ( $p < 0.05$ ) with  
940 growing-season river discharge at all seven USGS stream gages analyzed (Spearman correlation  
941 coefficient ranged between 0.55 along Beaverhead River and Big Hole River and 0.82 along the  
942 Jefferson River) (Table 7). In addition, all gages, except the Beaverhead River at Twin Bridges  
943 gage, were significantly correlated with spring snowfall (Spearman  $p$ -value  $< 0.05$ ), the climate  
944 variable that showed the highest correlation on average between summer discharge and the  
945 climate variables considered in the analysis. Unlike the riparian reaches, we saw no temporal  
946 trend (1984-2016) in the growing-season river discharge for any of the seven gages evaluated.  
947 However, because the watershed is a snowmelt-driven system, we also tested if trends were  
948 restricted to the low-flow seasons (autumn and winter). During the autumn months (September,  
949 October, November) we observed a decline in river discharge at the Madison River ( $p < 0.05$ ) and  
950 Gallatin River ( $p < 0.1$ ) gages and an increase at the Big Hole River gage near Wisdom ( $p < 0.05$ ),  
951 which is near the upstream end of the Big Hole River (Table 7). During the winter months  
952 (December, January, February) we observed a decline in river discharge at the Madison river  
953 gage ( $p < 0.05$ ) and an increase in river discharge at the Beaverhead River near the Twin Bridges  
954 gage ( $p < 0.1$ ) (Table 7).

955 **Table 7.** River discharge characteristics for the U.S. Geological Survey (USGS) gages used in the analysis. Summer (June, July,  
 956 August) discharge was correlated with the summer Normalized Difference Wetness Index (NDWI) and spring snowfall (March-June)  
 957 for the riparian reach adjacent to each gage, using the Spearman correlation. Temporal trends were quantified using the Mann-Kendall  
 958 test for trends. Percent discharge consumed and diverted is from the 2014 Water Plan (MT DNRC, 2014). JJA: June, July, August,  
 959 SON: September, October, November, DJF: December, January, February, D: dam present at gage, D-US: dam upstream, ND: no dam  
 960 or minimal flow regulation, na: data not available, SE: standard error, \*:  $p < 0.1$ , \*\*:  $p < 0.05$ .

|                   |                                                           |                   |                               |                                                     | <u>Seasonal mean river discharge (m<sup>3</sup> sec<sup>-1</sup>; ±SE)</u> |                     |                     |
|-------------------|-----------------------------------------------------------|-------------------|-------------------------------|-----------------------------------------------------|----------------------------------------------------------------------------|---------------------|---------------------|
| <u>Station ID</u> | <u>USGS Gage Name</u>                                     | <u>Reach Code</u> | <u>Contributing Area (ha)</u> | <u>Consumed (%) / Diverted but not consumed (%)</u> | <u>Summer (JJA)</u>                                                        | <u>Autumn (SON)</u> | <u>Winter (DJF)</u> |
| <u>6036650</u>    | <u>Jefferson River near Three Forks, MT</u>               | <u>JR1</u>        | <u>24692</u>                  | <u>6% / 20%</u>                                     | <u>68.3 (8.3)</u>                                                          | <u>35.0 (2.5)</u>   | <u>33.0 (1.5)</u>   |
| <u>6018500</u>    | <u>Beaverhead River near Twin Bridges, MT</u>             | <u>BVHR1</u>      | <u>8490</u>                   | <u>29% / 69%</u>                                    | <u>5.7 (1.7)</u>                                                           | <u>9.0 (1.2)</u>    | <u>8.8 (0.7)</u>    |
| <u>6025500</u>    | <u>Big Hole River near Melrose, MT</u>                    | <u>BHR2</u>       | <u>7581</u>                   | <u>13% / 43%</u>                                    | <u>44.3 (4.5)</u>                                                          | <u>11.4 (0.5)</u>   | <u>10.1 (0.4)</u>   |
| <u>6041000</u>    | <u>Madison River below Ennis Lake near McAllister, MT</u> | <u>MR2</u>        | <u>7132</u>                   | <u>3% / 11%</u>                                     | <u>56.9 (3.4)</u>                                                          | <u>44.5 (1.5)</u>   | <u>38.5 (0.7)</u>   |
| <u>6016000</u>    | <u>Beaverhead River at Barretts, MT</u>                   | <u>BVHR3</u>      | <u>6230</u>                   |                                                     | <u>20.3 (1.5)</u>                                                          | <u>8.3 (1.2)</u>    | <u>na</u>           |
| <u>6052500</u>    | <u>Gallatin River at Logan, MT</u>                        | <u>GR1</u>        | <u>3426</u>                   | <u>13% / 37%</u>                                    | <u>40.7 (3.6)</u>                                                          | <u>18.9 (0.7)</u>   | <u>18.6 (0.4)</u>   |
| <u>6024450</u>    | <u>Big Hole River below Big Lake Creek at Wisdom, MT</u>  | <u>BHR4</u>       | <u>2058</u>                   |                                                     | <u>7.9 (1.3)</u>                                                           | <u>1.6 (0.1)</u>    | <u>na</u>           |
|                   |                                                           |                   |                               | <u>Correlation coefficient (r)</u>                  | <u>Seasonal temporal trends (tau)</u>                                      |                     |                     |
| <u>Station ID</u> | <u>USGS Gage Name</u>                                     | <u>NDWI (JJA)</u> | <u>Snowfall (March-June)</u>  | <u>Flow Regulation</u>                              | <u>Summer (JJA)</u>                                                        | <u>Autumn (SON)</u> | <u>Winter (DJF)</u> |
| <u>6036650</u>    | <u>Jefferson River near Three Forks, MT</u>               | <u>0.82**</u>     | <u>0.89**</u>                 | <u>D-US</u>                                         | <u>0.02</u>                                                                | <u>-0.16</u>        | <u>-0.07</u>        |
| <u>6018500</u>    | <u>Beaverhead River near Twin Bridges, MT</u>             | <u>0.57**</u>     | <u>0.19</u>                   | <u>D-US</u>                                         | <u>-0.01</u>                                                               | <u>-0.10</u>        | <u>0.07*</u>        |
| <u>6025500</u>    | <u>Big Hole River near Melrose, MT</u>                    | <u>0.60**</u>     | <u>0.84**</u>                 | <u>ND</u>                                           | <u>0.12</u>                                                                | <u>0.07</u>         | <u>0.16</u>         |
| <u>6041000</u>    | <u>Madison River below Ennis Lake near McAllister, MT</u> | <u>0.64**</u>     | <u>0.79**</u>                 | <u>D</u>                                            | <u>0.06</u>                                                                | <u>-0.33**</u>      | <u>-0.33**</u>      |
| <u>6016000</u>    | <u>Beaverhead River at Barretts, MT</u>                   | <u>0.55**</u>     | <u>0.51**</u>                 | <u>D</u>                                            | <u>0.11</u>                                                                | <u>0.04</u>         | <u>na</u>           |
| <u>6052500</u>    | <u>Gallatin River at Logan, MT</u>                        | <u>0.60**</u>     | <u>0.69**</u>                 | <u>ND</u>                                           | <u>0.00</u>                                                                | <u>-0.20*</u>       | <u>-0.15</u>        |
| <u>6024450</u>    | <u>Big Hole River below Big Lake Creek at Wisdom, MT</u>  | <u>0.55**</u>     | <u>0.70**</u>                 | <u>ND</u>                                           | <u>0.02</u>                                                                | <u>0.28**</u>       | <u>na</u>           |

961  
962

963 **4. Discussion**

964 Across the western U.S., water withdrawals, diversions and impoundments associated  
965 with agriculture have contributed to riparian degradation (Goodwin et al., 1997; Klemas, 2014).

966 In examining the multi-decadal trends in riparian wetness for a total of 158 km<sup>2</sup> of riparian  
967 ecosystem across the UMH Basin, we found long-term, significant drying along 8 of the 19  
968 riparian reaches in this basin, including all three of the riparian reaches (the Jefferson, Madison  
969 and Gallatin Rivers) at the confluence forming the Missouri River. In contrast, we did not  
970 observe trends in growing-season river discharge or climate variables over the same period.

971 Shifts in land use, therefore, is a potential driver of riparian condition. Water withdrawals across  
972 the UMH basin are almost entirely surface-water (99%) and for irrigation (99%) (USGS 1988;  
973 Dieter et al., 2018). We found only a moderate increase in total irrigated area over the period  
974 (+10.5%). An increase in irrigated area is consistent with state-wide estimates over the same time  
975 period. The USDA Farm and Ranch Irrigation Surveys (FRIS), for instance, documented an  
976 increase in the area of irrigated agriculture across Montana of 18.9% between 1984 and 2013  
977 (USDA, 1984, 2014). The persistence of drying trends in riparian vegetation after accounting for  
978 the influence of climate variability, and the correlation of riparian drying with a basin-wide ~~shift~~  
979 ~~in agricultural changes in~~ irrigation practices, suggest that the complexities of agricultural water  
980 use and ~~crop management~~ irrigation practices are likely to be contributing factors to the drying of  
981 riparian areas in this basin.

982 One source of uncertainty in our analysis is that at the Landsat scale (30 m) we were  
983 unable to confidently distinguish gravity-fed irrigation from non-center pivot sprinkler irrigation,  
984 methods of irrigation that can be expected to show different rates of water efficiency. This source  
985 of uncertainty made it difficult to reach definitive conclusions about reach-scale changes in the  
986 consumptive water use using our data alone. However, our assumption of a transition away from  
987 gravity-fed irrigation and towards center-pivot irrigation is consistent with other comparable  
988 sources of data. Across Montana the FRIS surveys (1984 and 2013) documented an increase in  
989 the fraction irrigated with center pivot from 9% to 30%, a decrease in the fraction irrigated with  
990 gravity-fed irrigation from 77% to 57%, and a minimal change (<3%) in the fraction of  
991 agriculture irrigated with non-center pivot sprinklers (USDA, 1985, 2014). Across the UMH  
992 Basin, the Montana Department of Revenue's Final Land Unit Classification (FLU) surveys  
993 documented a 17% increase in center-pivot irrigation and a corresponding decrease in both

994 sprinkler and gravity-fed irrigation between 2010 and 2017. Despite these ancillary datasets,  
995 however, it is possible that shifts from gravity-fed irrigation to non-center pivot sprinkler  
996 irrigation, have also contributed to changes in return flow and riparian condition. Using the  
997 irrigation data generated in this study, the shift in irrigation practices was concentrated along the  
998 Beaverhead, Jefferson and Gallatin Rivers, all of which showed statistically significant drying in  
999 at least portions of their riparian reaches. Correspondingly, the Big Hole River sub-watershed,  
1000 which is dominated by gravity-fed irrigated hay and pasture (Montana DNRC, 2014), showed the  
1001 fewest hectares converted to center pivot irrigation relative to other sub-watersheds over the  
1002 study period, with no temporal trends in riparian wetness.

1003 Shifts away from gravity-fed irrigation have been observed across the United States  
1004 (Schaible, 2017). Advances in irrigation technology allow for water to be applied at the most  
1005 appropriate timing in plant root zones to increase crop consumptive use of water and therefore,  
1006 crop yields (Falkenmark and Lannerstad, 2005; Ward and Pulido-Velazquez, 2008). However,  
1007 despite the shift to more efficient irrigation methods, the total water applied to irrigated fields  
1008 across the U.S. remained largely stable over the same period (Schaible, 2017). This patterns may  
1009 indicate that local water savings do not necessarily translate to the watershed scale. Increases in  
1010 crop yields are linearly correlated with increases in evapotranspiration (Steduto et al., 2012), so  
1011 that the reduction in water application is often off-set by increases in evapotranspiration,  
1012 specifically crop transpiration (Ward and Pulido-Velazquez, 2008; Grafton et al., 2018). A  
1013 schematic of the potential impact of irrigation method on water cycling is shown in Fig. 10.  
1014 Further, proposed water savings in per field water applications often fail to account for farm-  
1015 level decisions and incentives (Ward and Pulido-Velazquez, 2008; Perry et al., 2017). Within the  
1016 current water rights framework, more efficient water use can incentivize farmers to make  
1017 changes to crop choices and crop rotation patterns, or to increase the total area irrigated or the  
1018 frequency of irrigation so that their water rights and usage are maintained and maximized  
1019 (Pfeiffer and Lin, 2014; Grafton et al., 2018). If there is a local reduction in water usage  
1020 downstream water users can more fully exercise their water rights so that there is no net  
1021 reduction in water usage at the watershed scale (Ward and Pulido-Velazquez, 2008; Perry et al.,  
1022 2017).

1023 Riparian and river condition for a given reach can be expected to be a function of its  
1024 upstream river network, including water added and removed from upstream reaches, as well as



1025 upstream land uses (Ver Hoef and Peterson, 2012; Fritz et al., 2018). Biotic integrity, for  
1026 example, has been shown to depend on upstream conditions (Schofield et al., 2018), which can  
1027 extend tens of kilometers up the channel network (Van Sickle and Johnson, 2008). In  
1028 consideration of this, the climate variables used to model temporal variability in riparian wetness  
1029 were calculated as a function of each reach’s total upstream contributing area. Similarly, we  
1030 considered upstream accumulated changes in irrigation to help interpret trends in the NDWI  
1031 anomaly-climate regression residuals. For instance the total upstream increase in hectares of  
1032 center pivot irrigation over the period was found to be significantly different between reaches  
1033 that showed a drying trend and those that did not. Cumulative effects of both climate and land  
1034 use may explain why the basin’s three most downstream riparian reaches (on the Gallatin River,  
1035 Madison River, and Jefferson River) all saw significant drying trends in the NDWI anomaly-  
1036 climate residuals, or the NDWI anomalies after accounting for climate variability. The  
1037 incremental drying effect might also help explain why we did not observe temporal trends in  
1038 riparian wetness in some headwater riparian reaches. For instance, along the headwater riparian  
1039 reaches of the Madison River (MR2), the Gallatin River (GR2), as well as the East Gallatin River  
1040 (EGR), the analyzed riparian vegetation extended to the upstream end of irrigated agriculture.  
1041 Although tAlthough the total amount of agriculture varieds among these riparian reaches,  
1042 potentially the incremental drying effects of irrigation on groundwater storage and return flow  
1043 do not become evident (spectrally or hydrologically) until accumulated lower in the watershed.  
1044 In additionL to water use, landscape characteristics can also inform how a riparian ecosystem  
1045 responds to changes in reach- or basin-scale hydrology. Well-drained soils and a higher Melton  
1046 Ruggedness number, characteristics significantly associated with the reach-scale riparian drying  
1047 trends, can be expected to facilitate the return flow of excess irrigation water to the riparian  
1048 corridor. These findings suggestImplying that both reach-scale and upstream characteristics can  
1049 influence how riparian vegetation will respond to changes in climate and land use.a shift towards  
1050 more “water efficient” irrigation might have a greater drying effect on nearby riparian  
1051 vegetation.

1052 While the presence of riparian drying trends in the NDWI anomaly-climate residuals  
1053 indicated that the observed drying trends were not solely attributable to climate, climate  
1054 variability was a significant predictor of the interannual variability in riparian wetness (e.g., Fig.  
1055 5 and Fig. 6), a finding documented in other geographic regions as well (e.g., Fu and Burgher,

1056 2015; Nguyen et al., 2015; Huntington et al., 2016). Drought events, and the resilience of river  
1057 and riparian ecosystems to these events, are a significant concern for stakeholders in the Upper  
1058 Missouri Headwaters Basin (Montana DNRC, 2015; McEvoy et al., 2018). EAlthough  
1059 evaluation of water rights and corresponding water withdrawals under drought conditions was  
1060 beyond the scope of this study, however, our findings suggest that the conversion to center pivot  
1061 irrigation could amplify the impacts of reduced precipitation on riparian areas. Additionally, an  
1062 increasing summer VPD could further increase crop water losses to evapotranspiration  
1063 (Massmann et al., 2018), potentially exacerbating both the hydrological effect and salinization  
1064 effect of irrigation conversion (Singh, 2015). We note, however, that climate and river discharge  
1065 trends were quantified only to be compared with trends observed in riparian wetness over the  
1066 same period (1984-2016). Because only partial climate and river discharge records were used,  
1067 our findings regarding the presence or absence of trends in the climate and river discharge data  
1068 should be interpreted with caution.

1069         Despite only partial discharge records being utilized, one interesting finding was that  
1070 over the same period a drying trend in riparian areas did not necessarily translate into a trend in  
1071 river discharge. We can speculate that because the rivers are snow-melt dominated (Markstrom  
1072 et al., 2016; Cross et al., 2017), during the summer months irrigation return flow may have an  
1073 impact on riparian areas but could represent a relatively small percent of summer flows. A  
1074 comprehensive water budget or hydrological modeling approach, however, would be needed to  
1075 quantify this, and specifically to determine how anthropogenic activities may have a differential  
1076 impact on riparian wetness relative to river discharge. Additionally, rivers across the basin vary  
1077 in the amount of flow regulation from dams. For example, the Big Hole River and Gallatin  
1078 Rivers are relatively unregulated while the Madison River, Beaverhead River, Ruby River and  
1079 Red Rock River are all regulated by large dams. The reservoirs above dams retain water during  
1080 the spring runoff, reducing peak flows, and release more water in the autumn, changing a river's  
1081 natural flow regime (Montana DNRC, 2014). It is possible that shifts in dam management and  
1082 corresponding changes in flow regulation could contribute to trends in riparian wetness.  
1083 However, river discharge (JJA) was significantly correlated with spring snowfall at eight of nine  
1084 gages, suggesting that even with seasonal flow regulation, discharge along dammed rivers still  
1085 typically represents interannual variability in climate.

1086           Efforts to characterize the factors influencing variability and trends in riparian wetness  
1087 are critical to maintain and restore riparian functionality. Healthy floodplains and riparian areas  
1088 serve a number of functions including slowing runoff, promoting local groundwater recharge,  
1089 and quickening the recovery of local groundwater storage post-drought (Montana DNRC, 2014).  
1090 Spectral indices calculated from satellite imagery have been successfully used to monitor the  
1091 response of riparian vegetation to variability in channel morphology (Henshaw et al., 2013;  
1092 Hamdan and Myint, 2015), as well as changes induced by the installation of in-stream restoration  
1093 structures (Hausner et al. 2018; Vanderhoof and Burt, 2018). While Landsat has been commonly  
1094 used to examine multi-decadal trends in vegetation condition (Goetz et al., 2005; McManus et  
1095 al., 2012; White et al., 2017), because of the narrow, linear footprint of riparian ecosystems  
1096 within human-influenced landscapes, efforts to apply Landsat time-series analysis to riparian  
1097 systems have been limited (e.g., Henshaw et al., 2013; Hamden and Myint, 2015; Nguyen et al.,  
1098 2015). Regional-scale Landsat efforts have tended to focus on changes to riparian extent rather  
1099 than riparian trends in greenness or wetness (e.g., Jones et al., 2010; Macfarlane et al., 2017).  
1100 Along river systems, however, the moderate resolution of Landsat can misrepresent riparian  
1101 edges or fail to detect portions of the riparian corridor that are narrower than Landsat’s minimum  
1102 mapping unit, potentially influencing the calculated spectral patterns. In our analysis we  
1103 minimized such errors by (1) restricting the analysis to rivers with riparian corridors large  
1104 enough to be measured using Landsat, and (2) using a consistent riparian area extent across the  
1105 time series. It is clear, however, that finer spatial resolution sources of imagery will be critical  
1106 for riparian corridors too narrow to be monitored with Landsat imagery. To this end, data sources  
1107 with increased spatial resolution are rapidly becoming more available and useful for monitoring  
1108 water resources (e.g., Sentinel-2, CubeSats) (e.g., Vande Kamp et al., 2013; Gärtner et al., 2016;  
1109 Cooley et al., 2017; Yang et al., 2017), but lack the multi-decadal data records provided by  
1110 Landsat. This means that for larger riparian corridors, Landsat spectral indices remain a critical  
1111 data source that can be used to characterize trends in riparian wetness as well as potentially  
1112 quantify the impact of land use changes, including long-term shifts in irrigation methods, on  
1113 riparian vegetation.

1114

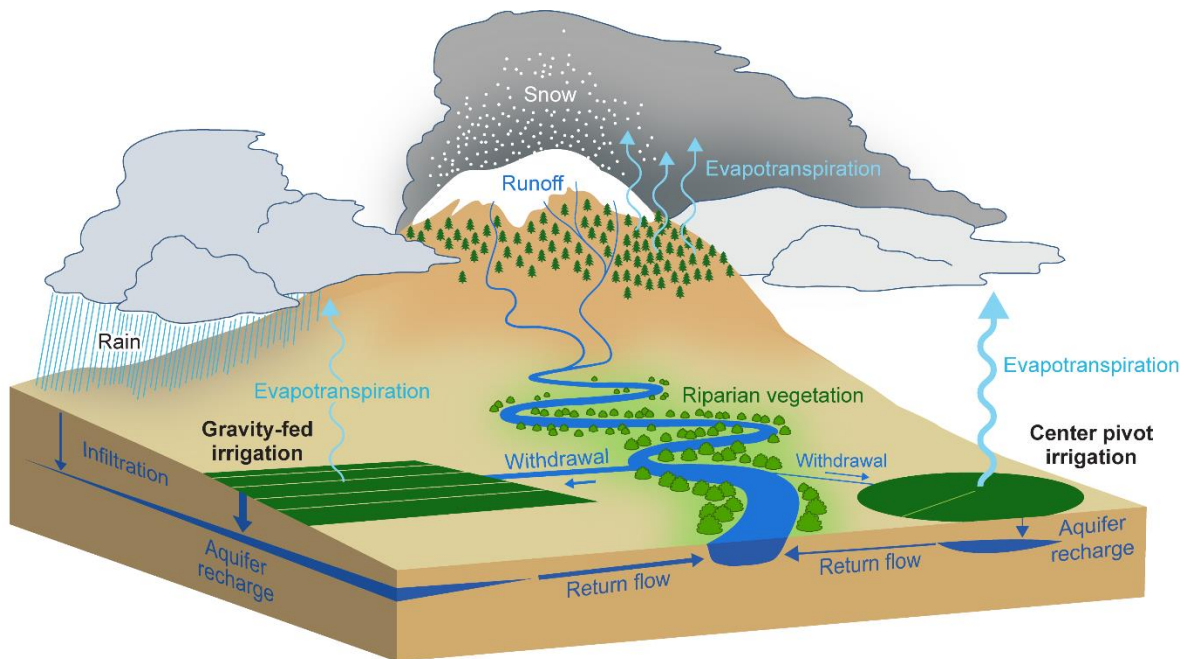

1115  
 1116 **Figure 10.** A schematic showing the potential impacts of changing irrigation types. While  
 1117 shifting to center pivot irrigation can be expected to reduce per-field water applications, it can  
 1118 also be expected to increase evapotranspiration as well as decrease sub-surface return-flow and  
 1119 aquifer recharge. Reduced withdrawal may not persist downstream but instead be used by the  
 1120 same farmer or a downstream user. Thicker and thinner lines are used to indicate more or less  
 1121 water, respectively.

1122  
 1123 **5. Conclusion**

1124 Riparian corridors provide valuable ecosystem functions including storing water,  
 1125 mitigating nutrients, pollutants, and sediments, providing wildlife corridors, and influencing  
 1126 water temperature (Vivoni et al., 2006; Lees and Peres, 2008; Isaak et al., 2012). A drying trend  
 1127 in riparian areas across the Upper Missouri Headwaters Basin could lessen the effectiveness of  
 1128 these functions and shift the systems towards more drought-tolerant plant species that are less  
 1129 adapted to highly variable flow regimes (Capon, 2013; Catford et al., 2014). Although promoted  
 1130 as a more water-efficient approach, several recent studies have demonstrated a lack of  
 1131 catchment-scale water savings after farmers transitioned to center pivot irrigation (Perry et al.,  
 1132 2017; Grafton et al., 2018). We were able to pair a Landsat time series analysis with climate and  
 1133 agricultural data to document a statistically significant drying trend, not explained by climate  
 1134 variability, along nearly half (42%) of riparian reaches in the Upper Missouri Headwaters Basin.  
 1135 ~~Although~~ the riparian reaches experiencing drying trends tended to have more upstream  
 1136 agriculture and greater shifts toward center pivot irrigation, but the correlations between  
 1137 agricultural activities and riparian wetness were imperfect, suggesting that the upstream river

1138 network, as well as other reach-scale characteristics such as the riparian species or the  
1139 geology/soil characteristics, also influence the response of a riparian reach to changes in water  
1140 withdrawal. In addition, the drying trends in riparian ecosystems were not observed in the snow-  
1141 melt driven river discharge (JJA), a finding that should be explored further using hydrological  
1142 models. Maintaining and improving riparian functionality across watersheds dominated by  
1143 agricultural activity will require not only more efforts to track temporal trends in riparian  
1144 vegetation, but also more efforts to separate out the relative influence of climate and  
1145 anthropogenic activities.

1146

## 1147 **6. Acknowledgements**

1148 This project was funded by the U.S. Geological Survey, Land Resources, Land Change Science  
1149 Program as well as by a U.S. EPA Region 8 grant, entitled “Building drought resiliency and  
1150 watershed prioritization using natural water storage techniques” and through the associated  
1151 interagency agreement (DW-014-92475401-0). We thank Haley Distler for her assistance in  
1152 delineating the riparian corridor and Jeremy Havens for his assistance in generating the  
1153 hydrology schematic. We also thank Ken Fritz, Robert Payn, Richard Marinos and the  
1154 anonymous reviewer for their insightful comments on earlier versions of this manuscript.  
1155 Following publication, the data related to this publication will be published in the U.S.  
1156 Geological Survey’s ScienceBase catalog (<https://doi.org/10.5066/P976LZ2G>). Any use of trade,  
1157 firm, or product names is for descriptive purposes only and does not imply endorsement by the  
1158 U.S. Government. This publication represents the views of the authors and does not necessarily  
1159 reflect the views or policies of the U.S. EPA.

1160

1161 **7. Author Contributions:** MV, JC, and LA designed the study, MV and JC derived the input  
1162 datasets, MV performed the analysis, and MV, JC, and LA wrote the manuscript.

1163

1164 **8. Competing interests:** The authors declare that they have no conflict of interest.

1165

1166 **9. References**

1167 Ascione, A., Cinque, A., Miccadei, E., Villani, F., Berti, C.: The Plio-Quaternary uplift  
1168 of the Apennine chain: New data from the analysis of topography and river valleys in  
1169 Central Italy, *Geomorphology*, 102, 105-118, 2008.

1170 Bauder, J. W.: Early season alfalfa irrigation strategies. Montana State University Extension,  
1171 Bozeman, MT. Available at [http://waterquality.montana.edu/farm-](http://waterquality.montana.edu/farm-ranch/irrigation/alfalfa/early.html)  
1172 [ranch/irrigation/alfalfa/early.html](http://waterquality.montana.edu/farm-ranch/irrigation/alfalfa/early.html) (last accessed, November 19, 2018), 2018.

1173 Boutin, C., Belanger, J.B.: Importance of riparian habitats to flora conservation in farming  
1174 landscapes of southern Quebec, Canada, *Agr. Ecosyst. Environ.*, 94, 73–87, 2003.

1175 Carrillo-Guerrero, Y., Glenn, E. P., Hinojosa-Huerta, O.: Water budget for agricultural and  
1176 aquatic ecosystems in the delta of the Colorado River, Mexico: Implications for obtaining  
1177 water for the environment, *Ecol. Eng.*, 59, 41-51, 2013.

1178 Catford, J. A., Morris, W. K., Vesk, P. A., Gippel, C. J., Downes, B. J.: Species and  
1179 environmental characteristics point to flow regulation and drought as drivers of riparian  
1180 plant invasion, *Biodiv. Res.*, 20(9), 1084-1096, 2014.

1181 Chatterjee, C., Kumar, R., Chakravorty, B., Lohani, A. K., Kumar, S.: Integrating remote  
1182 sensing and GIS techniques with groundwater flow modeling for assessment of  
1183 waterlogged areas, *Water Resour. Manag.*, 19(5), 539-554, 2005.

1184 Chowdary, V. M., Vinu Chandran, R., Neeti, N., Bothale, R. V., Srivastava, Y. K., Ingle, P.,  
1185 Ramakrishnan, D., Dutta, D., Jeyaram, A., Sharma, J.R., Singh, R.: Assessment of surface  
1186 and sub-surface waterlogged areas in irrigation command areas of Bihar state using remote  
1187 sensing and GIS, *Agr. Water Manag.*, 95, 754–766, 2008.

1188 Clancy, C. G.: Effects of dewatering on spawning by Yellowstone cutthroat trout in tributaries of  
1189 the Yellowstone River, Montana, *Am. Fish. Soc. Symp.*, 4, 37-41, 1988.

1190 Clifford, M.: Preserving stream flows in Montana through the Constitutional Public Trust  
1191 Doctrine: An underrated solution, *Publ. Land Law Rev.*, 16, 117-135, 1995.

1192 Cohen, J.: *Statistical Power Analysis for the Behavioral Sciences*, 2nd Edition. Routledge, 1988.

1193 Cooley, S., Smith, L., Stepan, L., Mascaro, J. Tracking dynamic northern surface water changes  
1194 with high-frequency Planet CubeSat imagery, *Rem. Sens.*, 9, 1306, 2017.

1195 Crétaux, J.-F., Biancamaria, S., Arsen, A., Bergé-Nguyen, M., Becker, M.: Global surveys of  
1196 reservoirs and lakes from satellites and regional application to the Syrdarya river  
1197 basin, *Environ. Res. Lett.*, 10, 015002, 2015.



1198 Cross, W. F., LaFave, J., Leone, A., Lonsdale, W., Royem, A., Patton, T., McGinnis, S.: Chapter  
1199 3, Water and climate change in Montana, in the 2017 Montana Climate Assessment (ed. C.  
1200 Whitlock, W. F. Cross, B. Maxwell, N. Silverman, A. A. Wade), Helena, MT, 77 pgs, 2017.  
1201 Cunningham, S. C., Thomson, J. R., Mac Nally, R., Read, J., Baker, P. J.: Groundwater change  
1202 forecasts widespread forest dieback across an extensive floodplain system, *Freshwat. Biol.*,  
1203 56, 1494-1508, 2011.

1204 Dieter, C. A., Linsey, K. S., Caldwell, R. R., Harris, M. A., Ivahnenko, T. I., Lovelace, J. K.,  
1205 Maupin, M. A., Barber, N. L. Estimated use of water in the United States county-level data  
1206 for 2015. U.S. Geological Survey, Reston, VA, 2018.

1207 Dragoni, W., Sukhiga, B. S.: Climate change and groundwater: a short review. *Geol Soc Lond*  
1208 *Spec Publ*, 288, 1–12, 2008.

1209 Duffield, J., Neher, C. J., Brown, T. C.: Recreation benefits of instream flow: Application to  
1210 Montana Big Hole and Bitterroot Rivers, *Water Resour. Res.*, 28, 2169-2181, 1992.

1211 Falkenmark, M., Lannerstad, M.: Consumptive water use to feed humanity – curing a blind spot,  
1212 *Hydrol. Earth Syst. Sci.*, 9, 15– 28, doi:10.5194/hess-9-15-2005, 2005

1213 Fritz, K. M., Schofield, K. A., Alexander, L. C., McManus, M. G., Golden, H. E., Lane, C. R.,  
1214 Kepner, W. G., LeDuc, S. D., DeMeester, J. E., Pollard, A. I.: Physical and chemical  
1215 connectivity of streams and riparian wetlands to downstream waters: a synthesis. *J. Am.*  
1216 *Water Res. Assoc.*, 54(2), 323-345, 2018.

1217 Fu, B., Burgher, I.: Riparian vegetation NDVI dynamics and its relationship with climate,  
1218 surface water and groundwater. *J. Arid Environ.*, 113, 59-68, 2015.

1219 Gao, B.: NDWI—a normalized difference water index for remote sensing of vegetation liquid  
1220 water from space. *Rem. Sens. Environ.*, 58, 257 – 266, 1996.

1221 Gärtner, P., Förster, M., Kleinschmit, B.: The benefit of synthetically generated RapidEye and  
1222 Landsat 8 data fusion time series for riparian forest disturbance monitoring. *Rem. Sens.*  
1223 *Environ.*, 177, 237-247, 2016.

1224 Gesch, D., Oimoen, M., Greenlee, S., Nelson, C., Steuck, M., Tyler, D. The National Elevation  
1225 Dataset. *Photogramm. Eng. Rem. Sens.*, 68(1), 5–11, 2002.

1226 Gilbert, R. O.: *Statistical Methods for Environmental Pollution Monitoring*, Wiley, NY, 1987.

1227 Goetz, S. J., Bunn, A. G., Fiske, G. J., Houghton, R. A.: Satellite-observed photosynthetic trends  
1228 across boreal North America associated with climate and fire disturbance, *Proc. Natl. Acad.*  
1229 *Sci. Unit. States Am.*, 102(38), 13521-13525, 2005.

1230 Goklany, I. M.: Comparing 20th century trends in U.S. and global agricultural water and land  
1231 use, *Water Int.*, 27, 321–329, 2002.

1232 Goodwin, C. N., Hawkins, C. P., Kershner J. L.: Riparian restoration in the western United  
1233 States: overview and perspective, *Restor. Ecol.*, 5, 4-14, 1997.

1234 Goudie A. S.: Global warming and fluvial geomorphology, *Geomorphology*, 79, 384–94, 2006.

1235 Gosnell, H., Haggerty, J. H., Byorth, P. A. Ranch ownership change and new approaches to  
1236 water resource management in southwestern Montana: implications for fisheries. *J. Am.*  
1237 *Water Res. Assoc.*, 43(4), 990-1003, 2007.

1238 Grafton, R. Q., Williams, J., Perry, C. J., Molle, F., Ringler, C., Steduto, P., Udall, B., Wheeler,  
1239 S. A., Wang, Y., Garrick, D., Allen, R. G. The paradox of irrigation efficiency, *Science*,  
1240 361(6404), 748-750, 2018.

1241 Gude, P. H., Hansen, A. J., Rasker, R., Maxwell, B.: Rates and drivers of rural residential  
1242 development in the Greater Yellowstone, *Landsc. Urban Plan.*, 77, 131–151, 2006.

1243 Hackett, O. M., Visher, F. N., McMurtrey, R. G., and Steinhilber, W. L.: Geology and ground  
1244 water resources of the Gallatin Valley, Gallatin County, Montana, U.S. Geological Survey  
1245 Water-Supply Paper 1482, 282, 1960.

1246 Hamdan, A., Myint, S. W.: Biogeomorphic relationships and riparian vegetation changes along  
1247 altered ephemeral stream channels: Florence to Marana, Arizona, *Prof. Geogr.*, 68(1), 26-38,  
1248 2015.

1249 Hamed, K. H., Rao, A. R.: A modified Mann-Kendall trend test for autocorrelated data. *J.*  
1250 *Hydrol.*, 2014(1-4), 182-196, 1998.

1251 Hansen, A. J., Rasker, R., Maxwell, B., Rotella, J. J., Johnson, J. D., Parmenter, A. W., Langner,  
1252 U., Cohen, W. B., Lawrence, R. L., Kraska, P. V.: Ecological causes and consequences of  
1253 demographic change in the new west, *Bioscience*, 52, 151–162, 2002.

1254 Hastie, T., Tibshirani, R., Friedman, J. *The Elements of Statistical Learning*. New York:  
1255 Springer, 2009.

1256 Hausner, M. B., Huntington, J. L., Nash, C., Morton, C., McEvoy, D. J., Pilliod, D. S.,  
1257 Hegewisch, K. C., Daudert, B., Abatzoglou, J. T., Grant, G.: Assessing the effectiveness of

1258 riparian restoration projects using Landsat and precipitation data from the cloud-computing  
1259 application ClimateEngine.org, *Ecolog. Eng.*, 120, 432-440, 2018.

1260 Henshaw, A. J., Gurnell, A. M., Bertoldi, W., Drake, N. A.: An assessment of the degree to  
1261 which Landsat TM data can support the assessment of fluvial dynamics, as revealed by  
1262 changes in vegetation extent and channel position, along a large river, *Geomorphology*, 202,  
1263 74-85, 2013.

1264 Homer, C., Dewitx, J., Yang, L., Jin, S., Danielson, P., Xian, G., Coulston, J., Herold, N.,  
1265 Wickham, J., Megown, K.: Completion of the 2011 National Land Cover Database for the  
1266 conterminous United States—Representing a decade of land cover change information,  
1267 *Photogramm. Eng. Rem. Sens.*, 81, 345–354, 2015.

1268 Huntington, J., McGwire, K., Morton, C., Snyder, K., Peterson, S., Erckson, T., Niswonger, R.,  
1269 Carroll, R., Smith, G., Allen, R.: Assessing the role of climate and resource management on  
1270 groundwater dependent ecosystem changes in arid environments with the Landsat archive.  
1271 *Rem. Sens. Environ.*, 185, 186-197, 2016.

1272 Hurvich, C.M., Tsai, C.L.: Regression and time series model selection in small samples,  
1273 *Biometrika*, 76(2), 297-307, 1989.

1274 Isaak, D. J., Wollrab, S., Horan, D., Chandler, G.: Climate change effects on stream and river  
1275 temperatures across the northwest U.S. from 1980-2009 and implications for salmonid fishes,  
1276 *Climatic Change*, 113(2), 499-524, 2012.

1277 Jones, K. B., Edmonds, C. E., Slonecker, E. T., Wickham, J. D., Neale, A. C., Wade, T. G.,  
1278 Riitters, K.H., Kepner, W.G.: Detecting changes in riparian habitat conditions based on  
1279 patterns of greenness change: A case study from the Upper San Pedro River Basin, USA,  
1280 *Ecol. Indic.*, 8, 89–99, 2008.

1281 Jones, K. B., Slonecker, E. T., Nash, M. S., Neale, A. C., Wade, T. G., Hamann, S.: Riparian  
1282 habitat changes across the continental United States (1972-2003) and potential implications  
1283 for sustaining ecosystem services, *Landsc. Ecol.*, 25, 1261-1275, 2010.

1284 Kendall, M. G.: *Rank Correlation Methods*, Griffin, London, 1975.

1285 Kendy, E., Bredehoeft, J. D.: Transient effects of groundwater pumping and surface-water  
1286 irrigation returns on streamflow, *Water Resour. Res.*, 42, W08415, 2006.

1287 Kerkvliet, J., Nowell, C., Lowe, S. The economic value of the Greater Yellowstone’s Blue-  
1288 Ribbon fishery, *N. Am. J. Fish. Manag.*, 22, 418-424, 2002.

1289 Klemas, V.: Remote sensing of riparian and wetland buffers: an overview. *J. Coast.*  
1290 *Res.*, 30, 869-880, 2014.

1291 Lees, A. C., Peres, C. A.: Conservation value of remnant riparian forests corridors of varying  
1292 quality for amazonian birds and mammals. *Conserv. Biol.*, 2, 439-449, 2008.

1293 Leyk, S. Uhl, J. H.: Historical built-up intensity layer series for the U.S. 1810 -  
1294 2015, <https://doi.org/10.7910/DVN/1WB9E4>, Harvard Dataverse, V1, 2018.

1295 Liaw, A., Wiener, M.: Breiman and Cutler's random forests for classification and regression; R  
1296 package version 4.6-12; R Foundation for Statistical Computing: Vienna, Austria, 1-29,  
1297 2015.

1298 Lowrance, R., Todd, R., Fail Jr., J., Hendrickson Jr., O., Leonard, R., Asmussen, L.: Riparian  
1299 forests as nutrient filters in agricultural watersheds, *Bioscience*, 34, 374–377, 1984.

1300 Macfarlane, W. W., Gilbert, J. T., Jensen, M. L., Gilbert, J. D., Hough-Snee, N., McHugh, P. A.,  
1301 Wheaton, J. M., Bennett, S. N. Riparian vegetation as an indicator of riparian condition:  
1302 detecting departures from historic condition across the North American West. *J. Environ.*  
1303 *Manag.*, 202(part 2), 447-460, 2017.

1304 Mann, H. B.: Nonparametric tests against trend, *Econometrica*, 13, 245-259, 1945.

1305 Markstrom, S. L., Hay, L. E., Clark, M. P. Towards simplification of hydrologic modeling:  
1306 identification of dominant processes, *Hydrol. Earth Syst. Sci.*, 20, 4655-4671, 2016.

1307 Massmann, A., Gentine, P., Lin, C.: When does vapor pressure deficit drive or reduce  
1308 evapotranspiration?, *Hydrol. Earth Syst. Sci. Discuss.*, [https://doi.org/10.5194/hess-2018-](https://doi.org/10.5194/hess-2018-553)  
1309 553, in review, 2018.

1310 McEvoy, J., Bathke, D. J., Burkardt, N., Cravens, A. E., Haigh, T., Hall, K. R., Hayes, M. J.,  
1311 Jedd, T., Podebradska, M., Wickham, E.: Ecological drought: Accounting for the non-  
1312 human impacts of water shortage in the Upper Missouri Headwaters Basin, Montana, USA,  
1313 *Resources*, 7(14), 1-17, 2018.

1314 McFeeters, S. K.: The use of normalized difference water index (NDWI) in the delineation of  
1315 open water features, *Internat. J. Rem. Sens.*, 17: 1425–1432, 1996.

1316 McFeeters, S. K.: Using the Normalized Difference Water Index within a geographic  
1317 information system to detect swimming pools for mosquito abatement: a practical approach,  
1318 *Rem. Sens.*, 5(7), 3544-3561, 2013.

1319 McManus, K. M., Morton, D. C., Masek, J. G., Wang, D., Sexton, J. O., Nagol, J. R., Ropars, P.,  
1320 Boudreau, S.: Satellite-based evidence for shrub and graminoid tundra expansion in  
1321 northern Quebec from 1986 to 2010, *Global Change Biol.*, 18(7), 2313-2323, 2012.

1322 Melton, M. A. The geomorphic and paleoclimatic significance of alluvial deposits in southern  
1323 Arizona, *J. Geology*, 73, 1–38, 1965.

1324 Montana Department of Natural Resources and Conservation (DNRC): Upper Missouri Basin  
1325 Water Plan 2014, Montana Department of Natural Resources and Conservation, Helena, MT,  
1326 219 pgs, 2014.

1327 Montana Department of Natural Resources and Conservation (DNRC): Montana State Water  
1328 Plan, Montana Department of Natural Resources and Conservation, Helena, MT, 64 pgs.,  
1329 2015.

1330 [Montana Drought Demonstration Partners, 2015: A Workplan for Drought Resilience in the](http://dnrc.mt.gov/divisions/water/management/docs/surface-waterstudies/workplan_drought_resilience_missouri_headwaters.pdf)  
1331 [Missouri Headwaters Basin: A National Demonstration Project.](http://dnrc.mt.gov/divisions/water/management/docs/surface-waterstudies/workplan_drought_resilience_missouri_headwaters.pdf)  
1332 [http://dnrc.mt.gov/divisions/water/management/docs/surface-](http://dnrc.mt.gov/divisions/water/management/docs/surface-waterstudies/workplan_drought_resilience_missouri_headwaters.pdf)  
1333 [waterstudies/workplan\\_drought\\_resilience\\_missouri\\_headwaters.pdf](http://dnrc.mt.gov/divisions/water/management/docs/surface-waterstudies/workplan_drought_resilience_missouri_headwaters.pdf) (Accessed August 1,  
1334 [2019](http://dnrc.mt.gov/divisions/water/management/docs/surface-waterstudies/workplan_drought_resilience_missouri_headwaters.pdf)).

1335 Murphy, M. A., Evans, J. S., Storfer, A.: Quantifying *Bufo boreas* connectivity in Yellowstone  
1336 National Park with landscape genetics, *Ecology*, 91(1), 252-261, 2010.

1337 Naiman, R. J., De´camps, H., McClain, M. E. Riparia: ecology, conservation and management of  
1338 streamside communities. New York: Academic Press, 2005.

1339 National Snow and Ice Data Center (NSIDC). All about snow. National Snow and Ice Data  
1340 Center, Boulder, CO. (last accessed, 3 October 2018), 2018.

1341 Nguyen, U., Glen, E. P., Nagler, P. L., Scott, R. L.: Long-term decrease in satellite vegetation  
1342 indices in response to environmental variables in an iconic desert riparian ecosystem: The  
1343 Upper San Pedro, Arizona, United States, *Ecohydrology*, 8, 610-625, 2015.

1344 Nilsson, C., Berggren, K.: Alterations of riparian ecosystems caused by river regulation,  
1345 *Bioscience*, 50, 783–792, 2000.

1346 NOAA National Climatic Data Center: Data Tools: 1981-2010 Normals. Available at  
1347 <http://www.ncdc.noaa.gov/cdo-web/datatools/normals>, (last accessed 3 October 2018), 2014.

1348 Pederson, G. T., Betancourt, J. L., McCabe, G. J.: Regional patterns and proximal causes of the  
1349 60 recent snowpack decline in the Rocky Mountains, U.S., *Geophys. Res. Lett.*, 40, 1811–  
1350 1816, 2013.

1351 Pederson, G. T., Gray, S. T., Woodhouse, C. A., Betancourt, J. L., Fagre, D. B., Littell, J. S.,  
1352 Watson, E., Luckman, B. H., Graumlich, L. J.: The unusual nature of recent snowpack  
1353 declines in the North American Cordillera, *Science*, 333, 332–335, 2011.

1354 Perry, C., Steduto, P., Karejeh, F.: Does improved irrigation technology save water? A review of  
1355 the evidence. Food and Agriculture Organization of the United Nations, Cairo, Egypt, 57  
1356 pgs., 2017.

1357 Peterson, E. E.: STARS: Spatial Tools for the Analysis of River Systems version 2.0.6 – a  
1358 tutorial, Queensland University of Technology, Brisbane, Australia, 47 pgs., 2017.

1359 Peterson, J. M., Ding, Y.: Economic adjustments to groundwater depletion in the high plains: Do  
1360 water-saving irrigation systems save water? *Am. J. Agric. Econ.*, 87, 147–159, 2005.

1361 Pfeiffer, L., Lin, C. Y. C.: Does efficient irrigation technology lead to reduced groundwater  
1362 extraction? Empirical evidence. *J. Environ. Econ. Manag.*, 67(2), 189-208, 2014.

1363 Poff, N. L., Allan, J. D., Bain, M. B., Karr, J. R., Prestagard, K. L.: The natural flow regime,  
1364 *BioScience*, 47, 769-784, 1997.

1365 Poff, B. Koestner, K. A. Neary, D. G. Henderson, V.: Threats to riparian ecosystems in Western  
1366 North America: an analysis of existing literature, *J. Am. Water Resour. As*, 47, 1241-1254,  
1367 2011.

1368 Poole, G. C., Berman, C. H.: An ecological perspective on in-stream temperature: Natural heat  
1369 dynamics and mechanisms of human-caused thermal degradation, *Environ. Manag.*, 27(6),  
1370 787-802, 2001.

1371 PRISM Climate Group, Oregon State University: Available at <http://prism.oregonstate.edu>. (last  
1372 accessed on 27 June, 2018), 2018.

1373 Richardson, D. M., Holmes, P. M., Esler, K. J., Galatowitsch, S. M., Stromberg, J. C., Kirkman,  
1374 S. P., Pysek, P., Hobbs, R. J.: Riparian vegetation: Degradation, alien plant invasions, and  
1375 restoration prospects, *Divers. Distrib.*, 13, 126–139, 2007.

1376 Rood, S. B., Pan, J., Gill, K. M., Franks, C. G., Samuelson, G. M., Shepherd, A: Declining  
1377 summer flows of Rocky Mountain rivers: changing seasonal hydrology and probable  
1378 impacts on floodplain forests, *J. Hydrol.*, 349, 397–410, 2008.



1379 Schaible, G.: Understanding irrigated agriculture. Statistic: Farm Practices & Management, U.S.  
1380 Department of Agriculture, Economic Research Service, 6 pgs., 2017.

1381 Schaible, G .D., Aillery, M. P.: Water conservation in irrigated agriculture: Trends and  
1382 challenges in the face of emerging demands, EIB-99, U.S. Department of Agriculture,  
1383 Economic Research Service: Washington, DC, USA, 2012.

1384 Schofield, K. A., Alexander, L. C., Ridley, C. E., Vanderhoof, M. K., Fritz, K. M., Autrey, B.,  
1385 DeMeester, J., Kepner, W. G., Lane, C. R., Leibowitz, S., Pollard, A. I.: Biota connect  
1386 aquatic habitats throughout freshwater ecosystem mosaics. *J. Am. Water Res. Assoc.*, 54(2),  
1387 372-399, DOI: 10.1111/1752-1688.12634, 2018.

1388 Shafroth, P. B., Stromberg, J. C., Patten, D. T.: Riparian vegetation response to altered  
1389 disturbance and stress regimes, *Ecol. Applic.*, 12(1), 107-123, 2002.

1390 Singh, A.: Soil salinization and waterlogging: A threat to environment and agricultural  
1391 sustainability, *Ecol. Indic.*, 57, 128-130, 2015.

1392 Slagle, S. E.: Geohydrologic conditions and land use in the Gallatin Valley, southwestern  
1393 Montana, 1992-93. U. S. Geological Survey Water-Resources Investigations Report 95-4034,  
1394 2 p., 1995.

1395 Soil Survey Staff, Natural Resources Conservation Service, United States Department of  
1396 Agriculture. Soil Survey Geographic (SSURGO) Database for [Montana]. Available online at  
1397 <https://sdmdataaccess.sc.egov.usda.gov>. Accessed [6/25/2018].

1398 Steduto, P., Hsiao, T. C., Fereres, E., Raes, D.: Crop yield response to water. Food and  
1399 Agricultural Organization, Irrigation and Drainage Paper 66, Rome, Italy, 505 pgs., 2012.

1400 Stromberg, J. C.: Restoration of riparian vegetation in the south-western United States:  
1401 Importance of flow regimes and fluvial dynamism, *J. Arid Environ.*, 49, 17–34, 2001.

1402 Stromberg, J. C., Lite, S. J., Rychener, T. J., Levick, L. R., Dixon, M. D., Watts, J. M.: Status of  
1403 the riparian ecosystem in the Upper San Pedro River, Arizona: Application of an assessment  
1404 model, *Environ. Monit. Assess.*, 115, 145–173, 2006.

1405 Sweeney, B. W., Bott, T. L., Jackson, J. K., Kaplan, L. A., Newbold, J. D., Standley, L. J,  
1406 Horwitz, R. J., Hession, W. C.: Riparian deforestation, stream narrowing, and loss of stream  
1407 ecosystem services. *Proc. Natl. Acad. Sci. Unit. States Am.*, 101, 14132–14137, 2004.

1408 Theobald, D. M., Norman, J. B., Peterson, E., Ferraz, S., Wade, A., Sherburne, M. R.:  
1409 Functional linkage of water basins and streams (FLoWS) v1 user’s guide: ArcGIS tools

1410 for network-based analysis of freshwater ecosystems. Natural Resource Ecology Lab,  
1411 Colorado State University, Fort Collins, CO, 43 pgs., 2006.

1412 Tucker, C. J.: Red and photographic infrared linear combinations for monitoring  
1413 vegetation, *Rem. Sens. Environ.*, 8, 127–150, 1979.

1414 U.S. Bureau of Reclamation (USBR): Climate Change Analysis for the Missouri River Basin,  
1415 Technical Memorandum No. 86-68210-2012-03, U.S. Bureau of Reclamation: Washington,  
1416 DC, USA, 2012.

1417 [U.S. Department of Agriculture \(USDA\): 1984 Farm and Ranch Irrigation Survey \(2013\), U.S.](#)  
1418 [Department of Commerce, Bureau of the Census, AG84-SR-1, 1984.](#)

1419 [U.S. Department of Agriculture \(USDA\): Farm and Ranch Irrigation Survey \(2013\), Volume 3,](#)  
1420 [Special Studies, Part 1, AC-12-SS-1, 2014.](#)

1421 U.S. Department of Agriculture (USDA): National Agricultural Statistics Service Cropland Data  
1422 Layer [Online]. Available at <https://nassgeodata.gmu.edu/CropScape/> (last accessed  
1423 November 5, 2018), USDA-NASS, Washington, DC., 2018.

1424 U.S. Geological Society (USGS): U.S. Geological Survey, Water Resources of the United States  
1425 [Online]. ScienceBase Data Publication  
1426 (<https://www.sciencebase.gov/catalog/item/57361cc8e4b0dae0d5df6d22>), Reston, VA, 1988.

1427 Vanderhoof, M. K., Burt, C.: Applying high-resolution imagery to evaluate restoration-induced  
1428 changes in stream condition, Missouri River Headwaters Basin, Montana, *Rem. Sens.*, 10(6),  
1429 913, DOI: 10.3390/rs10060913, 2018.

1430 Vanderhoof, M. K.: Lane, C.R.: The potential role of very high-resolution imagery to  
1431 characterize lake, wetland and stream systems across the Prairie Pothole Region, United  
1432 States, *Intern. J. Rem. Sens.*, 10.1080/01431161.2019.1582112, 2019.

1433 Van Sickle, J., Johnson, C. B.: Parametric distance weighting of landscape influence on streams,  
1434 *Landsc. Ecol.*, 23(4), 427-438, 2008.

1435 Vande Kamp, K., Rigge, M., Troelstrup, Jr., N.H., Smart, A.J., Wylie, B.: Detecting channel  
1436 riparian vegetation response to best-management-practices implementation in ephemeral  
1437 streams with the use of Spot high-resolution visible imagery, *Rang. Ecol. Manage.*, 66, 63-  
1438 70, 2013.

1439 Ver Hoef, J. M., Peterson, E. E.: A moving average approach for spatial statistical models of  
1440 stream networks, *J. Am. Stat. Assoc.*, 105, 489, 6-18, 2012.

- 1441 Vivoni, E., Bowman, R. S., Wychkoff, R. L., Jakubowski, R. T., Richards, K. E.: Analysis of a  
1442 monsoon flood event in an ephemeral tributary and its downstream hydrologic effects, *Water*  
1443 *Resour. Res.*, 42(3), W03404, 2006.
- 1444 Ward, F. A., Pulido-Velazquez, M.: Water conservation in irrigation can increase water use,  
1445 *Proc. Natl. Acad. Sci. Unit. States Am.*, 105(47), 18215-18220, 2008.
- 1446 White, J. C., Wulder, M. A., Hermosilla, T., Coops, N. C., Hobart, G. W.: Nationwide annual  
1447 characterization of 25 years of forest disturbance and recovery for Canada using Landsat  
1448 time series, *Rem. Sens. Environ.*, 194, 303-321, 2017.
- 1449 Wisser, D., Frohking, S., Douglas, E. M., Fekete, B. M., Vörösmarty, C. J., Schumann, A. H.:  
1450 Global irrigation water demand: variability and uncertainties arising from agricultural and  
1451 climate data sets. *Geophys. Res. Lett.*, 35(24), 1-5, 2008.
- 1452 Yang, X., Zhao, S., Qin, X., Zhao, N., Liang, L.: Mapping of urban surface water bodies from  
1453 Sentinel-2 MSI imagery at 10 m resolution via NDWI-based image sharpening. *Remot.*  
1454 *Sens.*, 9(6), 596, 2017.
- 1455
